# Supplementary material for: The DSF Quorum Sensing System Controls the Positive Influence of Stenotrophomonas maltophilia on Plants
Source: PubMed Central journal article supplement (PMC3715506; doi:10.1371/journal.pone.0067103), 2013-07-18
Supplement: pone.0067103.s002.pdf [file pone.0067103.s002.pdf]

**Supplementary Table 1: The complete list of the genes with a significant transcription fold change being regulated by DSF in *S. maltophilia* R551-3**

The minus sign before fold changes corresponds to down regulation of the corresponding genes in the *rpfF* mutant strain.

| <b>locus tag</b> | <b>fold change</b> | <b>(putative) product</b><br><b>wild-type/<i>rpfF</i> mutant</b> |
|------------------|--------------------|------------------------------------------------------------------|
| SmaI_0012        | 2.26               | phospholipase D/transphosphatidylase                             |
| SmaI_0013        | 3.62               | hypothetical protein                                             |
| SmaI_0014        | 1.51               | pyridoxine 5'-phosphate synthase                                 |
| SmaI_0018        | 4.52               | hypothetical protein                                             |
| SmaI_0022        | 2.26               | TonB-dependent receptor                                          |
| SmaI_0023        | 13.72              | hypothetical protein                                             |
| SmaI_0025        | 0.36               | Ku protein                                                       |
| SmaI_0027        | 0.18               | hypothetical protein                                             |
| SmaI_0030        | 0.30               | cysteine dioxygenase type I                                      |
| SmaI_0031        | 1.56               | LacI family transcriptional regulator                            |
| SmaI_0036        | 1.51               | hypothetical protein                                             |
| SmaI_0037        | 1.71               | TonB-dependent receptor                                          |
| SmaI_0038        | 0.23               | acid phosphatase                                                 |
| SmaI_0040        | -4.34              | hypothetical protein                                             |
| SmaI_0043        | 42.65              | hypothetical protein                                             |
| SmaI_0044        | 2.11               | hypothetical protein                                             |
| SmaI_0045        | 2.71               | formamidopyrimidine-DNA glycosylase                              |
| SmaI_0047        | 2.20               | thymidine kinase                                                 |
| SmaI_0049        | 3.16               | Sel1 domain-containing protein repeat-containing protein         |
| SmaI_0051        | 2.11               | acetyltransferase                                                |
| SmaI_0052        | 1.81               | hypothetical protein                                             |
| SmaI_0055        | 1.81               | hypothetical protein                                             |
| SmaI_0056        | 1.57               | glycerol-3-phosphate acyltransferase                             |
| SmaI_0057        | 23.25              | hypothetical protein                                             |
| SmaI_0060        | 2.71               | hypothetical protein                                             |
| SmaI_0061        | 1.81               | hypothetical protein                                             |
| SmaI_0066        | -4.93              | hypothetical protein                                             |
| SmaI_0067        | 3.62               | hypothetical protein                                             |
| SmaI_0068        | -9.44              | short-chain dehydrogenase/reductase SDR                          |
| SmaI_0069        | 0.45               | hypothetical protein                                             |
| SmaI_0070        | 1.81               | hypothetical protein                                             |
| SmaI_0071        | 0.30               | beta-lactamase                                                   |

|           |        |                                                      |
|-----------|--------|------------------------------------------------------|
| SmaI_0072 | -11.02 | AraC family transcriptional regulator                |
| SmaI_0074 | 1.81   | major facilitator superfamily protein                |
| SmaI_0075 | 0.23   | TonB-dependent receptor                              |
| SmaI_0076 | 12.23  | CopY family transcriptional repressor                |
| SmaI_0077 | 2.37   | peptidase M56 BlaR1                                  |
| SmaI_0078 | 0.45   | lipoprotein                                          |
| SmaI_0081 | 1.58   | hypothetical protein                                 |
| SmaI_0082 | 2.71   | hypothetical protein                                 |
| SmaI_0085 | 2.71   | hypothetical protein                                 |
| SmaI_0090 | 2.36   | peptidase U62 modulator of DNA gyrase                |
| SmaI_0092 | 30.75  | hypothetical protein                                 |
| SmaI_0096 | 1.88   | hypothetical protein                                 |
| SmaI_0097 | 0.45   | ATPase AAA                                           |
| SmaI_0098 | 1.62   | partition protein                                    |
| SmaI_0102 | 3.16   | thioesterase superfamily protein                     |
| SmaI_0104 | 6.33   | hypothetical protein                                 |
| SmaI_0105 | 1.89   | hypothetical protein                                 |
| SmaI_0110 | 0.34   | nitrogen regulatory protein P-II                     |
| SmaI_0111 | 1.66   | ammonium transporter                                 |
| SmaI_0114 | 5.43   | hypothetical protein                                 |
| SmaI_0116 | 1.81   | LytTR family two component transcriptional regulator |
| SmaI_0118 | 0.30   | alpha/beta hydrolase fold domain-containing protein  |
| SmaI_0120 | 3.32   | hypothetical protein                                 |
| SmaI_0124 | 2.55   | copper/zinc binding superoxide dismutase             |
| SmaI_0129 | 1.66   | HemY domain-containing protein                       |
| SmaI_0131 | 0.30   | uroporphyrinogen-III synthase                        |
| SmaI_0134 | 1.91   | rhodanese domain-containing protein                  |
| SmaI_0146 | 1.81   | Glyoxalase/bleomycin resistance protein/dioxygenase  |
| SmaI_0148 | 0.18   | hypothetical protein                                 |
| SmaI_0155 | 22.20  | two component LuxR family transcriptional regulator  |
| SmaI_0157 | 1.51   | cytochrome c class I                                 |
| SmaI_0158 | 1.70   | electron-transferring-flavoprotein dehydrogenase     |
| SmaI_0161 | -82.34 | carboxymuconolactone decarboxylase                   |
| SmaI_0162 | 0.30   | 4-oxalocrotonate tautomerase                         |
| SmaI_0164 | 19.83  | hypothetical protein                                 |
| SmaI_0167 | 1.71   | 3-oxoacyl-ACP synthase                               |
| SmaI_0168 | 1.63   | alpha/beta hydrolase fold domain-containing protein  |
| SmaI_0169 | -12.28 | hypothetical protein                                 |

|           |        |                                                   |
|-----------|--------|---------------------------------------------------|
| SmaI_0178 | 2.11   | hypothetical protein                              |
| SmaI_0179 | 2.45   | peptidyl-tRNA hydrolase domain-containing protein |
| SmaI_0182 | -11.70 | 3-dehydroquinate dehydratase                      |
| SmaI_0183 | 11.77  | hypothetical protein                              |
| SmaI_0186 | 0.26   | LysR family transcriptional regulator             |
| SmaI_0187 | 0.45   | LysR family transcriptional regulator             |
| SmaI_0188 | 0.36   | malate synthase                                   |
| SmaI_0190 | 2.26   | cyclic nucleotide-binding protein                 |
| SmaI_0195 | 0.28   | hypothetical protein                              |
| SmaI_0199 | 0.13   | TetR family transcriptional regulator             |
| SmaI_0202 | 0.30   | hypothetical protein                              |
| SmaI_0203 | 2.35   | hypothetical protein                              |
| SmaI_0208 | 37.17  | lysine exporter protein LysE/YggA                 |
| SmaI_0210 | 0.30   | NAD-dependent deacetylase                         |
| SmaI_0212 | 0.45   | LysR family transcriptional regulator             |
| SmaI_0214 | 0.18   | nicotinamidase                                    |
| SmaI_0215 | 0.26   | hypothetical protein                              |
| SmaI_0217 | 3.62   | hypothetical protein                              |
| SmaI_0220 | 1.51   | acyl-CoA dehydrogenase domain-containing protein  |
| SmaI_0222 | 1.54   | enoyl-CoA hydratase/isomerase                     |
| SmaI_0224 | 1.96   | OsmC family protein                               |
| SmaI_0228 | 1.61   | hypothetical protein                              |
| SmaI_0235 | 1.81   | sporulation domain-containing protein             |
| SmaI_0236 | 5.43   | addiction module killer protein                   |
| SmaI_0237 | -86.43 | putative transcriptional regulator                |
| SmaI_0238 | 1.61   | arginase                                          |
| SmaI_0239 | 0.36   | entericidin EcnAB                                 |
| SmaI_0243 | -51.86 | hypothetical protein                              |
| SmaI_0246 | -59.15 | hypothetical protein                              |
| SmaI_0248 | 0.26   | hypothetical protein                              |
| SmaI_0249 | 2.03   | RarD protein, DMT superfamily transporter         |
| SmaI_0251 | 0.45   | hypothetical protein                              |
| SmaI_0252 | 3.62   | hypothetical protein                              |
| SmaI_0253 | 0.23   | ABC transporter-like protein                      |
| SmaI_0254 | 11.30  | RND family efflux transporter MFP subunit         |
| SmaI_0255 | 4.52   | ABC transporter-like protein                      |
| SmaI_0260 | 0.45   | Catalase domain-containing protein                |
| SmaI_0265 | 2.41   | hypothetical protein                              |

|           |        |                                                                           |
|-----------|--------|---------------------------------------------------------------------------|
| SmaI_0266 | 2.66   | hypothetical protein                                                      |
| SmaI_0270 | 0.30   | hypothetical protein                                                      |
| SmaI_0274 | 0.26   | hypothetical protein                                                      |
| SmaI_0281 | 6.71   | DNA repair protein RadC                                                   |
| SmaI_0283 | -16.68 | two component LuxR family transcriptional regulator                       |
| SmaI_0288 | 0.30   | osmosensitive K <sup>+</sup> channel signal transduction histidine kinase |
| SmaI_0289 | 1.81   | potassium-transporting ATPase subunit C                                   |
| SmaI_0291 | -15.27 | potassium-transporting ATPase subunit A                                   |
| SmaI_0292 | 0.45   | hypothetical protein                                                      |
| SmaI_0293 | 2.51   | hypothetical protein                                                      |
| SmaI_0300 | 2.01   | tyrosyl-tRNA synthetase                                                   |
| SmaI_0303 | 1.64   | peptidase M23                                                             |
| SmaI_0304 | 1.60   | carboxyl-terminal protease                                                |
| SmaI_0307 | 2.71   | nicotinamide mononucleotide transporter PnuC                              |
| SmaI_0311 | 1.55   | cytochrome c oxidase subunit I                                            |
| SmaI_0312 | 40.52  | hypothetical protein                                                      |
| SmaI_0313 | 1.81   | cytochrome C oxidase assembly protein                                     |
| SmaI_0314 | 1.58   | cytochrome c oxidase subunit III                                          |
| SmaI_0315 | 0.45   | hypothetical protein                                                      |
| SmaI_0316 | 6.48   | hypothetical protein                                                      |
| SmaI_0321 | 1.81   | bile acid:sodium symporter                                                |
| SmaI_0329 | 1.58   | dihydroneopterin aldolase                                                 |
| SmaI_0331 | 2.05   | glycoside hydrolase family 3                                              |
| SmaI_0335 | 14.35  | hypothetical protein                                                      |
| SmaI_0337 | 2.71   | hypothetical protein                                                      |
| SmaI_0339 | 0.11   | mandelate racemase/muconate lactonizing protein                           |
| SmaI_0342 | 0.45   | TonB-dependent receptor plug                                              |
| SmaI_0344 | 3.62   | peptidase M15D vanX D-ala-D-ala dipeptidase                               |
| SmaI_0353 | 2.71   | hypothetical protein                                                      |
| SmaI_0356 | 1.81   | hypothetical protein                                                      |
| SmaI_0362 | 17.00  | hypothetical protein                                                      |
| SmaI_0364 | 1.54   | PadR-like family transcriptional regulator                                |
| SmaI_0367 | -56.74 | hypothetical protein                                                      |
| SmaI_0368 | 8.17   | TonB family protein                                                       |
| SmaI_0370 | 48.17  | hypothetical protein                                                      |
| SmaI_0372 | 3.44   | hypothetical protein                                                      |
| SmaI_0382 | 16.42  | hypothetical protein                                                      |
| SmaI_0386 | 0.45   | hypothetical protein                                                      |

|           |        |                                                                 |
|-----------|--------|-----------------------------------------------------------------|
| SmaI_0387 | -12.91 | alpha/beta hydrolase fold domain-containing protein             |
| SmaI_0389 | 3.01   | hypothetical protein                                            |
| SmaI_0391 | 0.45   | polysaccharide deacetylase                                      |
| SmaI_0392 | 6.33   | hypothetical protein                                            |
| SmaI_0393 | -15.77 | hypothetical protein                                            |
| SmaI_0394 | -25.10 | hypothetical protein                                            |
| SmaI_0397 | 2.71   | hypothetical protein                                            |
| SmaI_0398 | 1.81   | hypothetical protein                                            |
| SmaI_0399 | 0.45   | cobalamin synthesis protein P47K                                |
| SmaI_0400 | 0.45   | ABC transporter-like protein                                    |
| SmaI_0402 | -4.43  | beta-lactamase                                                  |
| SmaI_0403 | 1.81   | major facilitator superfamily protein                           |
| SmaI_0404 | 0.45   | EAL domain-containing protein                                   |
| SmaI_0410 | 11.43  | DGPFAETKE family protein                                        |
| SmaI_0413 | -14.66 | hypothetical protein                                            |
| SmaI_0414 | 0.45   | putative ECF subfamily RNA polymerase sigma-24 subunit          |
| SmaI_0420 | 0.45   | signal transduction histidine kinase LytS                       |
| SmaI_0421 | -27.12 | LytTR family two component transcriptional regulator            |
| SmaI_0422 | 13.72  | hypothetical protein                                            |
| SmaI_0424 | 5.43   | hypothetical protein                                            |
| SmaI_0425 | 8.04   | TetR family transcriptional regulator                           |
| SmaI_0426 | 0.45   | major facilitator superfamily protein                           |
| SmaI_0427 | -26.72 | major facilitator superfamily protein                           |
| SmaI_0429 | 0.20   | PAS/PAC sensor-containing diguanylate cyclase/phosphodiesterase |
| SmaI_0430 | -23.70 | LysR family transcriptional regulator                           |
| SmaI_0431 | -38.20 | DoxX family protein                                             |
| SmaI_0435 | 1.58   | hypothetical protein                                            |
| SmaI_0436 | 6.33   | hypothetical protein                                            |
| SmaI_0440 | 2.34   | methionine sulfoxide reductase B                                |
| SmaI_0441 | 1.81   | hypothetical protein                                            |
| SmaI_0442 | 0.45   | hypothetical protein                                            |
| SmaI_0447 | 2.11   | PAS/PAC sensor hybrid histidine kinase                          |
| SmaI_0449 | 35.90  | hypothetical protein                                            |
| SmaI_0451 | 1.70   | pseudouridine synthase                                          |
| SmaI_0455 | 2.71   | DNA polymerase IV                                               |
| SmaI_0457 | 0.30   | NAD-dependent epimerase/dehydratase                             |
| SmaI_0458 | 0.30   | LysR family transcriptional regulator                           |
| SmaI_0463 | 0.50   | TfoX domain-containing protein                                  |

|           |        |                                                                      |
|-----------|--------|----------------------------------------------------------------------|
| SmaI_0464 | 0.39   | putative GAF sensor protein                                          |
| SmaI_0465 | 0.18   | dithiobiotin synthetase                                              |
| SmaI_0466 | 1.96   | GntR family transcriptional regulator                                |
| SmaI_0468 | 2.67   | cytochrome c biogenesis protein transmembrane region                 |
| SmaI_0470 | 0.45   | winged helix family two component transcriptional regulator          |
| SmaI_0472 | 0.42   | integral membrane sensor signal transduction histidine kinase        |
| SmaI_0482 | 2.98   | maleylacetoacetate isomerase                                         |
| SmaI_0483 | 2.17   | twitching motility protein                                           |
| SmaI_0485 | 2.53   | OmpA/MotB domain-containing protein                                  |
| SmaI_0497 | 1.66   | hypothetical protein                                                 |
| SmaI_0512 | -64.61 | GtrA family protein                                                  |
| SmaI_0513 | 0.34   | hypothetical protein                                                 |
| SmaI_0514 | 1.81   | hypothetical protein                                                 |
| SmaI_0515 | 3.01   | hypothetical protein                                                 |
| SmaI_0517 | 1.65   | 3-oxoacid CoA-transferase subunit A                                  |
| SmaI_0520 | 2.26   | 2OG-Fe(II) oxygenase                                                 |
| SmaI_0524 | 1.81   | hypothetical protein                                                 |
| SmaI_0526 | 2.14   | histone family protein nucleoid-structuring protein H-NS             |
| SmaI_0529 | 0.49   | CDP-diacylglycerol/serine O-phosphatidyltransferase                  |
| SmaI_0534 | 0.27   | hypothetical protein                                                 |
| SmaI_0537 | 2.11   | YjgP/YjgQ family permease                                            |
| SmaI_0539 | 19.23  | RDD domain-containing protein                                        |
| SmaI_0540 | 1.58   | site-specific tyrosine recombinase XerD                              |
| SmaI_0544 | 0.40   | YadA domain-containing protein                                       |
| SmaI_0546 | 2.03   | general secretory pathway protein E                                  |
| SmaI_0549 | 4.52   | general secretion pathway protein H                                  |
| SmaI_0552 | -30.24 | General secretion pathway protein K                                  |
| SmaI_0558 | 0.49   | family 2 glycosyl transferase                                        |
| SmaI_0567 | 0.18   | bacteriophage N4 adsorption protein B                                |
| SmaI_0572 | 1.81   | hypothetical protein                                                 |
| SmaI_0577 | 0.45   | riboflavin biosynthesis protein RibD                                 |
| SmaI_0579 | 1.81   | hypothetical protein                                                 |
| SmaI_0581 | 2.09   | riboflavin synthase subunit alpha                                    |
| SmaI_0582 | 1.70   | 3,4-dihydroxy-2-butanone 4-phosphate synthase                        |
| SmaI_0587 | 3.01   | FAD linked oxidase domain-containing protein                         |
| SmaI_0588 | 2.71   | membrane-bound metal-dependent hydrolase                             |
| SmaI_0591 | 1.81   | uroporphyrin-III C/tetrapyrrole (Corrin/Porphyrin) methyltransferase |
| SmaI_0592 | 1.81   | hypothetical protein                                                 |

|           |        |                                                                                  |
|-----------|--------|----------------------------------------------------------------------------------|
| SmaI_0595 | 1.66   | S-adenosyl-methyltransferase <i>MraW</i>                                         |
| SmaI_0602 | 2.06   | undecaprenyldiphospho-muramoylpentapeptide beta-N- acetylglucosaminyltransferase |
| SmaI_0612 | 1.81   | hypothetical protein                                                             |
| SmaI_0614 | 0.38   | 5,10-methylenetetrahydrofolate reductase                                         |
| SmaI_0615 | -5.64  | alpha/beta hydrolase fold domain-containing protein                              |
| SmaI_0616 | 9.00   | signal transduction histidine kinase <i>LytS</i>                                 |
| SmaI_0617 | -14.28 | <i>LytTR</i> family two component transcriptional regulator                      |
| SmaI_0619 | 2.11   | integral membrane sensor signal transduction histidine kinase                    |
| SmaI_0622 | 1.81   | hypothetical protein                                                             |
| SmaI_0624 | 0.45   | hypothetical protein                                                             |
| SmaI_0625 | -55.18 | <i>ybaK/ebcC</i> protein                                                         |
| SmaI_0627 | 1.53   | peptidase S9 prolyl oligopeptidase active site domain-containing protein         |
| SmaI_0631 | 0.23   | phospholipid/glycerol acyltransferase                                            |
| SmaI_0632 | -6.53  | metallophosphoesterase                                                           |
| SmaI_0633 | 1.81   | membrane-bound metal-dependent hydrolase                                         |
| SmaI_0635 | 1.81   | hypothetical protein                                                             |
| SmaI_0641 | 1.51   | Ribokinase                                                                       |
| SmaI_0645 | 3.16   | TonB-dependent hemoglobin/transferrin/lactoferrin family receptor                |
| SmaI_0646 | -8.71  | hypothetical protein                                                             |
| SmaI_0648 | 2.71   | hypothetical protein                                                             |
| SmaI_0649 | 1.51   | hypothetical protein                                                             |
| SmaI_0650 | 0.30   | ABC transporter-like protein                                                     |
| SmaI_0654 | 0.23   | G-D-S-L family lipolytic protein                                                 |
| SmaI_0655 | 0.23   | diacylglycerol kinase                                                            |
| SmaI_0657 | 8.14   | major facilitator superfamily protein                                            |
| SmaI_0658 | 38.07  | <i>LemA</i> family protein                                                       |
| SmaI_0659 | 0.30   | hypothetical protein                                                             |
| SmaI_0663 | 1.64   | hypothetical protein                                                             |
| SmaI_0664 | 0.50   | Dihydrofolate reductase                                                          |
| SmaI_0665 | 2.26   | hypothetical protein                                                             |
| SmaI_0666 | 3.26   | diadenosine tetraphosphatase                                                     |
| SmaI_0668 | 1.96   | dimethyladenosine transferase                                                    |
| SmaI_0674 | 2.71   | hypothetical protein                                                             |
| SmaI_0677 | 3.62   | hypothetical protein                                                             |
| SmaI_0679 | 0.27   | zinc-binding CMP/dCMP deaminase                                                  |
| SmaI_0680 | 1.51   | hypothetical protein                                                             |
| SmaI_0681 | 0.49   | hypothetical protein                                                             |
| SmaI_0684 | 1.51   | methionine sulfoxide reductase A                                                 |

|           |        |                                                                     |
|-----------|--------|---------------------------------------------------------------------|
| SmaI_0690 | 5.51   | protein-(glutamine-N5) methyltransferase                            |
| SmaI_0692 | 1.51   | LysR family transcriptional regulator                               |
| SmaI_0695 | 2.26   | N-formylglutamate amidohydrolase                                    |
| SmaI_0697 | 1.51   | 5'-3' exonuclease                                                   |
| SmaI_0698 | 1.81   | nitroreductase                                                      |
| SmaI_0703 | 7.23   | RNA polymerase factor sigma-70                                      |
| SmaI_0705 | 1.99   | NAD(P)(+) transhydrogenase                                          |
| SmaI_0709 | 2.11   | hypothetical protein                                                |
| SmaI_0710 | 3.16   | ArsR family transcriptional regulator                               |
| SmaI_0714 | 42.27  | hypothetical protein                                                |
| SmaI_0715 | 2.71   | flavoprotein WrbA                                                   |
| SmaI_0716 | 0.32   | ribonuclease BN/unknown domain fusion protein                       |
| SmaI_0721 | 1.51   | peptide chain release factor 1                                      |
| SmaI_0724 | 0.45   | outer membrane lipoprotein LolB                                     |
| SmaI_0729 | 1.87   | GTP-dependent nucleic acid-binding protein EngD                     |
| SmaI_0730 | 25.94  | hypothetical protein                                                |
| SmaI_0732 | 3.62   | hypothetical protein                                                |
| SmaI_0733 | 1.81   | hypothetical protein                                                |
| SmaI_0735 | 2.03   | two component LuxR family transcriptional regulator                 |
| SmaI_0737 | 1.81   | response regulator receiver modulated diguanylate phosphodiesterase |
| SmaI_0791 | 2.71   | pseudouridine synthase                                              |
| SmaI_0798 | -16.29 | hypothetical protein                                                |
| SmaI_0799 | 2.11   | zinc-binding alcohol dehydrogenase family protein                   |
| SmaI_0801 | 0.27   | hypothetical protein                                                |
| SmaI_0806 | 1.70   | L-threonine 3-dehydrogenase                                         |
| SmaI_0811 | 1.75   | colicin V production protein                                        |
| SmaI_0814 | 1.58   | rhs element Vgr protein                                             |
| SmaI_0815 | 2.11   | peptidyl-Asp metalloendopeptidase                                   |
| SmaI_0816 | 1.71   | UDP-2,3-diacetylglucosamine hydrolase                               |
| SmaI_0817 | -9.68  | PA-phosphatase-like phosphoesterase                                 |
| SmaI_0819 | 4.84   | TonB-dependent receptor plug                                        |
| SmaI_0828 | 1.52   | isocitrate dehydrogenase                                            |
| SmaI_0830 | 10.40  | LysR family transcriptional regulator                               |
| SmaI_0831 | -13.72 | hypothetical protein                                                |
| SmaI_0832 | 0.23   | hypothetical protein                                                |
| SmaI_0834 | 12.83  | hypothetical protein                                                |
| SmaI_0839 | 1.50   | histone family protein DNA-binding protein                          |
| SmaI_0843 | 1.81   | hypothetical protein                                                |



|           |        |                                                     |
|-----------|--------|-----------------------------------------------------|
| SmaI_0846 | 2.03   | protein serine/threonine phosphatase                |
| SmaI_0848 | 1.81   | hypothetical protein                                |
| SmaI_0851 | 1.81   | beta-lactamase domain-containing protein            |
| SmaI_0852 | 0.20   | hypothetical protein                                |
| SmaI_0853 | 1.51   | small multidrug resistance protein                  |
| SmaI_0855 | 0.45   | N-acetyltransferase GCN5                            |
| SmaI_0859 | 0.40   | recombination protein RecR                          |
| SmaI_0860 | 1.96   | histidine triad (HIT) protein                       |
| SmaI_0863 | 3.16   | hypothetical protein                                |
| SmaI_0864 | 1.55   | ATPase                                              |
| SmaI_0866 | 16.59  | maf protein                                         |
| SmaI_0875 | 2.49   | hypothetical protein                                |
| SmaI_0876 | 2.81   | aminodeoxychorismate lyase                          |
| SmaI_0878 | 1.96   | DNA polymerase III subunit delta'                   |
| SmaI_0880 | 1.81   | 4-oxalocrotonate tautomerase                        |
| SmaI_0881 | 2.71   | late control D family protein                       |
| SmaI_0882 | 1.81   | tail X family protein                               |
| SmaI_0883 | 2.71   | P2 GpU family protein                               |
| SmaI_0886 | 0.30   | phage major tail tube protein                       |
| SmaI_0888 | -15.84 | hypothetical protein                                |
| SmaI_0889 | 1.73   | hypothetical protein                                |
| SmaI_0890 | -16.05 | phage tail protein I                                |
| SmaI_0891 | 0.15   | baseplate J family protein                          |
| SmaI_0892 | 6.33   | GPW/gp25 family protein                             |
| SmaI_0893 | 1.81   | phage baseplate assembly protein V                  |
| SmaI_0894 | 0.23   | hypothetical protein                                |
| SmaI_0896 | 9.73   | lysozyme                                            |
| SmaI_0897 | 13.49  | hypothetical protein                                |
| SmaI_0898 | 10.51  | hypothetical protein                                |
| SmaI_0899 | 0.36   | hypothetical protein                                |
| SmaI_0900 | 1.81   | hypothetical protein                                |
| SmaI_0901 | -23.00 | hypothetical protein                                |
| SmaI_0902 | -18.98 | hypothetical protein                                |
| SmaI_0903 | 0.45   | virulence-associated E family protein               |
| SmaI_0906 | 35.85  | hypothetical protein                                |
| SmaI_0907 | 0.30   | TonB-dependent siderophore receptor                 |
| SmaI_0908 | 1.81   | PepSY-associated TM helix domain-containing protein |
| SmaI_0911 | 2.26   | pentapeptide repeat-containing protein              |

|           |        |                                                               |
|-----------|--------|---------------------------------------------------------------|
| SmaI_0914 | 2.71   | hypothetical protein                                          |
| SmaI_0915 | 0.45   | LysR family transcriptional regulator                         |
| SmaI_0916 | 1.81   | major facilitator superfamily protein                         |
| SmaI_0917 | 0.30   | TonB-dependent siderophore receptor                           |
| SmaI_0918 | 0.45   | integral membrane sensor signal transduction histidine kinase |
| SmaI_0919 | 1.81   | winged helix family two component transcriptional regulator   |
| SmaI_0923 | 0.45   | hypothetical protein                                          |
| SmaI_0924 | 0.14   | hypothetical protein                                          |
| SmaI_0925 | 17.65  | major facilitator superfamily protein                         |
| SmaI_0926 | 2.71   | MerR family transcriptional regulator                         |
| SmaI_0927 | 1.81   | short chain dehydrogenase                                     |
| SmaI_0928 | -17.90 | LysR family transcriptional regulator                         |
| SmaI_0929 | 2.11   | pyrroline-5-carboxylate reductase                             |
| SmaI_0933 | 4.52   | aldo/keto reductase                                           |
| SmaI_0936 | 0.30   | N-acetyltransferase GCN5                                      |
| SmaI_0941 | 1.94   | Holliday junction resolvase-like protein                      |
| SmaI_0942 | 1.71   | aspartate carbamoyltransferase catalytic subunit              |
| SmaI_0943 | 9.61   | hypothetical protein                                          |
| SmaI_0945 | 0.36   | hypothetical protein                                          |
| SmaI_0959 | 2.86   | KpsF/GutQ family protein                                      |
| SmaI_0960 | 1.73   | BolA family protein                                           |
| SmaI_0965 | 0.13   | phosphoribosylglycinamide formyltransferase                   |
| SmaI_0967 | -24.74 | hypothetical protein                                          |
| SmaI_0983 | 3.32   | flavodoxin/nitric oxide synthase                              |
| SmaI_0984 | 9.72   | ApbE family lipoprotein                                       |
| SmaI_0985 | 4.22   | hypothetical protein                                          |
| SmaI_0986 | -20.15 | hypothetical protein                                          |
| SmaI_0987 | 0.45   | PepSY-associated TM helix domain-containing protein           |
| SmaI_0989 | 23.03  | hypothetical protein                                          |
| SmaI_0991 | 1.51   | Sel1 domain-containing protein repeat-containing protein      |
| SmaI_0993 | -38.76 | hypothetical protein                                          |
| SmaI_1005 | 0.30   | hypothetical protein                                          |
| SmaI_1006 | 1.81   | hypothetical protein                                          |
| SmaI_1008 | 2.26   | OsmC family protein                                           |
| SmaI_1009 | 2.26   | phenazine biosynthesis protein PhzF family                    |
| SmaI_1010 | 0.23   | phenazine biosynthesis protein PhzF family                    |
| SmaI_1014 | 2.71   | hypothetical protein                                          |
| SmaI_1017 | -6.47  | alpha amylase catalytic protein                               |

|           |        |                                                               |
|-----------|--------|---------------------------------------------------------------|
| SmaI_1019 | 4.60   | alpha-glucosidase                                             |
| SmaI_1020 | 0.45   | hypothetical protein                                          |
| SmaI_1021 | 0.30   | major facilitator superfamily protein                         |
| SmaI_1024 | 0.30   | N-acetyltransferase GCN5                                      |
| SmaI_1027 | 16.45  | hypothetical protein                                          |
| SmaI_1032 | 0.45   | LacI family transcriptional regulator                         |
| SmaI_1038 | 0.45   | hypothetical protein                                          |
| SmaI_1039 | -7.17  | short-chain dehydrogenase/reductase SDR                       |
| SmaI_1041 | 1.81   | Xylose isomerase domain-containing protein                    |
| SmaI_1044 | -42.15 | hypothetical protein                                          |
| SmaI_1045 | -17.64 | cytochrome c class I                                          |
| SmaI_1046 | 1.81   | Xylose isomerase domain-containing protein                    |
| SmaI_1047 | 4.07   | oxidoreductase domain-containing protein                      |
| SmaI_1048 | 0.34   | nucleoside:H symporter                                        |
| SmaI_1050 | 1.81   | LacI family transcriptional regulator                         |
| SmaI_1054 | 0.30   | isocitrate lyase family protein                               |
| SmaI_1056 | 2.11   | diguanylate cyclase                                           |
| SmaI_1058 | 2.71   | hypothetical protein                                          |
| SmaI_1061 | 2.03   | hypothetical protein                                          |
| SmaI_1063 | -8.98  | hypothetical protein                                          |
| SmaI_1067 | 2.26   | metallophosphoesterase                                        |
| SmaI_1068 | -12.73 | hypothetical protein                                          |
| SmaI_1069 | 2.71   | hypothetical protein                                          |
| SmaI_1072 | -14.66 | hypothetical protein                                          |
| SmaI_1073 | 1.63   | GntR family transcriptional regulator                         |
| SmaI_1077 | -8.14  | phosphoribosyl-dephospho-CoA transferase                      |
| SmaI_1078 | 0.45   | malonate decarboxylase subunit gamma                          |
| SmaI_1079 | 3.01   | malonate decarboxylase subunit beta                           |
| SmaI_1082 | -2.38  | TonB-dependent siderophore receptor                           |
| SmaI_1083 | 0.50   | malate:quinone oxidoreductase                                 |
| SmaI_1084 | -70.23 | N-acetyltransferase GCN5                                      |
| SmaI_1089 | -18.19 | hypothetical protein                                          |
| SmaI_1090 | 1.81   | OPT family oligopeptide transporter                           |
| SmaI_1092 | 2.71   | hypothetical protein                                          |
| SmaI_1096 | 1.65   | septum formation inhibitor                                    |
| SmaI_1098 | 2.71   | integral membrane sensor signal transduction histidine kinase |
| SmaI_1099 | 1.66   | two component LuxR family transcriptional regulator           |
| SmaI_1102 | 0.23   | peptidase M15B and M15C DD-carboxypeptidase VanY/endolysin    |

|           |        |                                                               |
|-----------|--------|---------------------------------------------------------------|
| Smal_1104 | -29.16 | hypothetical protein                                          |
| Smal_1105 | -29.16 | hypothetical protein                                          |
| Smal_1106 | 0.45   | hypothetical protein                                          |
| Smal_1107 | 1.96   | phosphoribosylglycinamide formyltransferase 2                 |
| Smal_1109 | 2.03   | arginyl-tRNA-protein transferase                              |
| Smal_1110 | 8.38   | hypothetical protein                                          |
| Smal_1111 | 0.36   | ECF subfamily RNA polymerase sigma-24 subunit                 |
| Smal_1114 | 8.14   | enoyl-CoA hydratase/isomerase                                 |
| Smal_1119 | 1.64   | 50S ribosomal protein L21                                     |
| Smal_1120 | 1.52   | 50S ribosomal protein L27                                     |
| Smal_1129 | 1.81   | hypothetical protein                                          |
| Smal_1130 | 2.26   | hypothetical protein                                          |
| Smal_1131 | 0.30   | hypothetical protein                                          |
| Smal_1132 | 0.39   | TonB-dependent receptor plug                                  |
| Smal_1136 | 2.71   | NAD-binding D-isomer specific 2-hydroxyacid dehydrogenase     |
| Smal_1139 | 3.62   | hypothetical protein                                          |
| Smal_1144 | 3.16   | diguanylate cyclase/phosphodiesterase                         |
| Smal_1148 | 0.45   | hypothetical protein                                          |
| Smal_1149 | 1.51   | cytochrome c assembly protein                                 |
| Smal_1151 | 1.81   | 2-nitropropane dioxygenase                                    |
| Smal_1154 | 1.95   | 16S rRNA-processing protein RimM                              |
| Smal_1155 | 1.63   | tRNA (guanine-N(1)-)-methyltransferase                        |
| Smal_1158 | 0.23   | hypothetical protein                                          |
| Smal_1160 | 0.23   | MATE efflux family protein                                    |
| Smal_1164 | 2.49   | hypothetical protein                                          |
| Smal_1168 | 36.13  | putative barnase inhibitor                                    |
| Smal_1176 | 7.61   | lysine exporter protein LysE/YggA                             |
| Smal_1177 | 2.71   | hypothetical protein                                          |
| Smal_1184 | 2.51   | 2,3-diketo-5-methylthio-1-phosphopentane phosphatase          |
| Smal_1185 | 0.36   | DegT/DnrJ/EryC1/StrS aminotransferase                         |
| Smal_1186 | 0.23   | hypothetical protein                                          |
| Smal_1188 | 0.50   | alpha/beta hydrolase fold domain-containing protein           |
| Smal_1189 | 1.51   | integral membrane sensor signal transduction histidine kinase |
| Smal_1191 | 5.43   | metallophosphoesterase                                        |
| Smal_1192 | 0.45   | HxIR family transcriptional regulator                         |
| Smal_1193 | 1.81   | major facilitator superfamily protein                         |
| Smal_1198 | 1.50   | phosphoglyceromutase                                          |
| Smal_1200 | 0.18   | metal dependent phosphohydrolase                              |

|           |        |                                                                 |
|-----------|--------|-----------------------------------------------------------------|
| SmaI_1203 | 4.52   | hypothetical protein                                            |
| SmaI_1207 | 2.71   | hypothetical protein                                            |
| SmaI_1208 | 1.68   | peptidase M28                                                   |
| SmaI_1212 | 0.45   | major facilitator superfamily protein                           |
| SmaI_1214 | 0.49   | TonB-dependent receptor                                         |
| SmaI_1217 | 1.58   | Nucleotide diphosphatase                                        |
| SmaI_1218 | -21.26 | methylated-DNA--protein-cysteine methyltransferase              |
| SmaI_1219 | 1.81   | AraC family transcriptional regulator                           |
| SmaI_1222 | 3.62   | hypothetical protein                                            |
| SmaI_1224 | 0.27   | hypothetical protein                                            |
| SmaI_1226 | 2.11   | PAS/PAC sensor-containing diguanylate cyclase/phosphodiesterase |
| SmaI_1227 | 1.51   | diguanylate cyclase                                             |
| SmaI_1229 | 0.10   | diguanylate cyclase                                             |
| SmaI_1230 | 1.66   | SMC domain-containing protein                                   |
| SmaI_1231 | 1.51   | hypothetical protein                                            |
| SmaI_1232 | 5.81   | hypothetical protein                                            |
| SmaI_1233 | -11.78 | Glyoxalase/bleomycin resistance protein/dioxygenase             |
| SmaI_1234 | 0.39   | beta-lactamase                                                  |
| SmaI_1235 | 1.60   | ABC transporter-like protein                                    |
| SmaI_1236 | 0.45   | glucose-1-phosphatase/inositol phosphatase                      |
| SmaI_1238 | 39.78  | glutathione-dependent formaldehyde-activating protein           |
| SmaI_1242 | 0.45   | hypothetical protein                                            |
| SmaI_1248 | 2.26   | hypothetical protein                                            |
| SmaI_1249 | 1.68   | acetyl-CoA carboxylase carboxyltransferase subunit alpha        |
| SmaI_1252 | 0.36   | Ribonuclease H                                                  |
| SmaI_1264 | 1.67   | diguanylate cyclase                                             |
| SmaI_1267 | 0.45   | pili assembly chaperone                                         |
| SmaI_1268 | 1.81   | hypothetical protein                                            |
| SmaI_1271 | -14.22 | pili assembly chaperone                                         |
| SmaI_1272 | 0.15   | Spore coat U domain-containing protein                          |
| SmaI_1279 | 0.15   | Sel1 domain-containing protein repeat-containing protein        |
| SmaI_1282 | 1.81   | peptidase S45 penicillin amidase                                |
| SmaI_1286 | 0.30   | MarR family transcriptional regulator                           |
| SmaI_1288 | 2.26   | secretion protein HlyD family protein                           |
| SmaI_1289 | 1.81   | EmrB/QacA subfamily drug resistance transporter                 |
| SmaI_1294 | 0.45   | glutathione-dependent formaldehyde-activating protein           |
| SmaI_1296 | 0.30   | NodT family RND efflux system outer membrane lipoprotein        |
| SmaI_1298 | 0.30   | RND family efflux transporter MFP subunit                       |

|           |        |                                                                     |
|-----------|--------|---------------------------------------------------------------------|
| SmaI_1302 | 1.53   | ribonuclease T                                                      |
| SmaI_1304 | -13.83 | hypothetical protein                                                |
| SmaI_1307 | -36.92 | phosphate uptake regulator PhoU                                     |
| SmaI_1308 | 0.45   | phosphate transporter ATP-binding protein                           |
| SmaI_1309 | -12.10 | phosphate ABC transporter permease                                  |
| SmaI_1310 | 0.18   | phosphate ABC transporter permease                                  |
| SmaI_1311 | 1.81   | phosphate ABC transporter substrate-binding protein                 |
| SmaI_1312 | 4.65   | phosphate ABC transporter substrate-binding protein                 |
| SmaI_1313 | 2.71   | phosphate-selective porin O and P                                   |
| SmaI_1315 | 1.51   | hypothetical protein                                                |
| SmaI_1316 | 0.45   | enoyl-CoA hydratase/isomerase                                       |
| SmaI_1320 | 4.52   | N-acetylmuramyl-L-alanine amidase, negative regulator of AmpC, AmpD |
| SmaI_1321 | 0.45   | hypothetical protein                                                |
| SmaI_1323 | 2.71   | hypothetical protein                                                |
| SmaI_1325 | 15.03  | hypothetical protein                                                |
| SmaI_1327 | 7.34   | hypothetical protein                                                |
| SmaI_1331 | 7.36   | hypothetical protein                                                |
| SmaI_1336 | 2.41   | hypothetical protein                                                |
| SmaI_1338 | 0.45   | FAD dependent oxidoreductase                                        |
| SmaI_1339 | 0.45   | peptidase C26                                                       |
| SmaI_1341 | 1.51   | family 1 extracellular solute-binding protein                       |
| SmaI_1343 | 0.27   | spermidine/putrescine ABC transporter ATPase                        |
| SmaI_1345 | 0.30   | ornithine carbamoyltransferase                                      |
| SmaI_1350 | -28.12 | hypothetical protein                                                |
| SmaI_1351 | 0.30   | hypothetical protein                                                |
| SmaI_1355 | 1.51   | ABC transporter-like protein                                        |
| SmaI_1357 | 3.11   | (dimethylallyl)adenosine tRNA methylthiotransferase                 |
| SmaI_1358 | 7.61   | glutathione S-transferase domain-containing protein                 |
| SmaI_1360 | 0.45   | Lytic transglycosylase                                              |
| SmaI_1364 | 1.55   | glutathione S-transferase domain-containing protein                 |
| SmaI_1367 | 4.72   | hypothetical protein                                                |
| SmaI_1369 | 1.81   | hypothetical protein                                                |
| SmaI_1372 | 6.33   | alkylhydroperoxidase-like protein                                   |
| SmaI_1375 | 0.33   | short-chain dehydrogenase/reductase SDR                             |
| SmaI_1378 | 1.51   | putative type IV pilus assembly protein FimT                        |
| SmaI_1380 | 2.11   | hypothetical protein                                                |
| SmaI_1381 | 3.16   | PilX protein                                                        |
| SmaI_1390 | 33.72  | hypothetical protein                                                |

|           |       |                                                                     |
|-----------|-------|---------------------------------------------------------------------|
| Smal_1395 | 1.81  | DNA internalization-related competence protein ComEC/Rec2           |
| Smal_1397 | 4.82  | biopolymer transport protein ExbD/ToIR                              |
| Smal_1398 | 2.11  | lipid A ABC exporter, fused ATPase and inner membrane subunits MsbA |
| Smal_1399 | 5.43  | tetraacyldisaccharide 4'-kinase                                     |
| Smal_1400 | 1.91  | 3-deoxy-manno-octulosonate cytidyltransferase                       |
| Smal_1401 | 2.07  | protein tyrosine phosphatase                                        |
| Smal_1402 | 1.58  | NHL repeat containing protein                                       |
| Smal_1406 | 1.81  | hypothetical protein                                                |
| Smal_1409 | 1.81  | ABC transporter-like protein                                        |
| Smal_1414 | 0.30  | hypothetical protein                                                |
| Smal_1415 | 0.45  | ArsR family transcriptional regulator                               |
| Smal_1416 | 0.45  | hypothetical protein                                                |
| Smal_1417 | 1.81  | hypothetical protein                                                |
| Smal_1418 | 47.20 | hypothetical protein                                                |
| Smal_1419 | 0.45  | hypothetical protein                                                |
| Smal_1423 | 11.77 | hypothetical protein                                                |
| Smal_1430 | 2.03  | BLUF domain-containing protein                                      |
| Smal_1433 | 5.43  | N-acetyltransferase GCN5                                            |
| Smal_1435 | 1.58  | FKBP-type peptidylprolyl isomerase                                  |
| Smal_1436 | 2.71  | hypothetical protein                                                |
| Smal_1438 | 1.60  | luciferase-like monooxygenase                                       |
| Smal_1442 | 1.76  | hypothetical protein                                                |
| Smal_1444 | 0.15  | peptidase S10 serine carboxypeptidase                               |
| Smal_1451 | 1.91  | hypothetical protein                                                |
| Smal_1453 | 1.99  | cell division protein FtsB                                          |
| Smal_1462 | -5.41 | transposase IS116/IS110/IS902 family protein                        |
| Smal_1463 | 2.71  | hypothetical protein                                                |
| Smal_1468 | 1.81  | hypothetical protein                                                |
| Smal_1470 | 2.11  | tRNA delta(2)-isopentenylpyrophosphate transferase                  |
| Smal_1474 | 0.32  | 2-polyprenylphenol 6-hydroxylase                                    |
| Smal_1479 | 0.36  | carbon starvation protein CstA                                      |
| Smal_1480 | 0.49  | TonB-dependent receptor                                             |
| Smal_1482 | 2.17  | TonB-dependent siderophore receptor                                 |
| Smal_1484 | 0.30  | TonB-dependent receptor plug                                        |
| Smal_1486 | -7.69 | hypothetical protein                                                |
| Smal_1487 | 2.71  | hypothetical protein                                                |
| Smal_1488 | 0.15  | 2-oxoacid dehydrogenase subunit E1                                  |
| Smal_1493 | 2.71  | alkaline phosphatase                                                |

|           |        |                                                                      |
|-----------|--------|----------------------------------------------------------------------|
| Smal_1501 | 0.45   | TonB-dependent siderophore receptor                                  |
| Smal_1502 | 0.18   | Pirin domain-containing protein                                      |
| Smal_1503 | 2.26   | LysR family transcriptional regulator                                |
| Smal_1509 | 1.54   | alkyl hydroperoxide reductase                                        |
| Smal_1510 | 1.53   | amino acid-binding ACT domain-containing protein                     |
| Smal_1512 | 1.96   | hypothetical protein                                                 |
| Smal_1514 | 0.39   | sugar transporter                                                    |
| Smal_1519 | 2.26   | hypothetical protein                                                 |
| Smal_1522 | 1.51   | two component Fis family transcriptional regulator                   |
| Smal_1526 | 1.70   | two component LuxR family transcriptional regulator                  |
| Smal_1527 | 0.40   | keto-hydroxyglutarate-aldolase/keto-deoxy- phosphogluconate aldolase |
| Smal_1531 | 1.54   | glucose-6-phosphate 1-dehydrogenase                                  |
| Smal_1533 | 0.23   | folate-binding protein YgfZ                                          |
| Smal_1540 | 0.45   | hypothetical protein                                                 |
| Smal_1549 | 0.45   | methyltransferase                                                    |
| Smal_1554 | 2.26   | beta-lactamase domain-containing protein                             |
| Smal_1556 | 1.71   | uracil phosphoribosyltransferase                                     |
| Smal_1558 | 1.81   | NHL repeat containing protein                                        |
| Smal_1559 | -15.27 | metallophosphoesterase                                               |
| Smal_1562 | 4.22   | deoxyribodipyrimidine photo-lyase                                    |
| Smal_1565 | 4.52   | hypothetical protein                                                 |
| Smal_1566 | 1.81   | short-chain dehydrogenase/reductase SDR                              |
| Smal_1568 | 2.71   | hydrophobe/amphiphile efflux-1 (HAE1) family transporter             |
| Smal_1569 | -7.08  | short-chain dehydrogenase/reductase SDR                              |
| Smal_1570 | 0.13   | NodT family RND efflux system outer membrane lipoprotein             |
| Smal_1572 | 1.81   | endonuclease/exonuclease/phosphatase                                 |
| Smal_1573 | 4.52   | cytochrome P450                                                      |
| Smal_1574 | -22.12 | hypothetical protein                                                 |
| Smal_1575 | 1.81   | LuxR family transcriptional regulator                                |
| Smal_1576 | 0.23   | chaperone protein HchA                                               |
| Smal_1583 | -8.39  | secretion protein HlyD family protein                                |
| Smal_1584 | 9.95   | ABC transporter-like protein                                         |
| Smal_1585 | 2.71   | abortive infection protein                                           |
| Smal_1587 | 1.81   | hypothetical protein                                                 |
| Smal_1588 | 5.43   | N-acetyltransferase GCN5                                             |
| Smal_1590 | 1.86   | SsrA-binding protein                                                 |
| Smal_1591 | 1.81   | cyclase/dehydrase                                                    |
| Smal_1593 | 1.70   | SmpA/OmlA domain-containing protein                                  |



|           |        |                                                         |
|-----------|--------|---------------------------------------------------------|
| Smal_1595 | -8.31  | G-D-S-L family lipolytic protein                        |
| Smal_1605 | 1.81   | prephenate dehydrogenase                                |
| Smal_1606 | 0.30   | hypothetical protein                                    |
| Smal_1609 | 0.18   | hypothetical protein                                    |
| Smal_1612 | 2.49   | hypothetical protein                                    |
| Smal_1614 | 1.81   | S-adenosylmethionine--tRNA ribosyltransferase-isomerase |
| Smal_1618 | 1.51   | preprotein translocase subunit SecF                     |
| Smal_1622 | 6.33   | YaeQ family protein                                     |
| Smal_1623 | 4.52   | pseudouridine synthase                                  |
| Smal_1624 | 1.81   | hypothetical protein                                    |
| Smal_1630 | -4.84  | hypothetical protein                                    |
| Smal_1631 | -11.93 | LysR family transcriptional regulator                   |
| Smal_1633 | 4.89   | transposase IS116/IS110/IS902 family protein            |
| Smal_1634 | 0.45   | cytochrome c class I                                    |
| Smal_1637 | 2.41   | acriflavin resistance protein                           |
| Smal_1638 | 0.39   | acriflavin resistance protein                           |
| Smal_1640 | 1.67   | N-acetyltransferase GCN5                                |
| Smal_1642 | 1.70   | Agmatine deiminase                                      |
| Smal_1643 | 1.96   | hypothetical protein                                    |
| Smal_1648 | 1.81   | hypothetical protein                                    |
| Smal_1649 | 1.64   | hypothetical protein                                    |
| Smal_1660 | 1.54   | hypothetical protein                                    |
| Smal_1663 | -6.68  | hypothetical protein                                    |
| Smal_1664 | 7.50   | lysine exporter protein LysE/YggA                       |
| Smal_1668 | 1.51   | potassium efflux system protein                         |
| Smal_1674 | 0.44   | hypothetical protein                                    |
| Smal_1677 | 26.52  | hypothetical protein                                    |
| Smal_1679 | -12.44 | ThiJ/Pfpl domain-containing protein                     |
| Smal_1680 | -14.17 | hypothetical protein                                    |
| Smal_1685 | 1.81   | Activator of Hsp90 ATPase 1 family protein              |
| Smal_1687 | -12.44 | short chain dehydrogenase                               |
| Smal_1688 | 1.81   | AraC family transcriptional regulator                   |
| Smal_1692 | 0.45   | AraC family transcriptional regulator                   |
| Smal_1693 | 3.62   | TonB-dependent receptor                                 |
| Smal_1694 | -17.97 | FMN reductase                                           |
| Smal_1697 | 7.03   | flavin-dependent oxidoreductase                         |
| Smal_1698 | -4.28  | amidohydrolase                                          |
| Smal_1699 | -9.47  | N-acetyltransferase GCN5                                |

|           |        |                                                                         |
|-----------|--------|-------------------------------------------------------------------------|
| Smal_1700 | 5.41   | polar amino acid ABC transporter inner membrane subunit                 |
| Smal_1705 | 2.17   | short-chain dehydrogenase/reductase SDR                                 |
| Smal_1707 | 0.45   | short-chain dehydrogenase/reductase SDR                                 |
| Smal_1708 | 1.81   | hypothetical protein                                                    |
| Smal_1709 | 2.26   | TetR family transcriptional regulator                                   |
| Smal_1712 | 2.26   | major facilitator superfamily protein                                   |
| Smal_1713 | 1.58   | short-chain dehydrogenase/reductase SDR                                 |
| Smal_1714 | 5.43   | putative acetyltransferase                                              |
| Smal_1715 | 1.51   | ArsR family transcriptional regulator                                   |
| Smal_1718 | 0.45   | DoxX family protein                                                     |
| Smal_1722 | 0.36   | hypothetical protein                                                    |
| Smal_1726 | 0.27   | hypothetical protein                                                    |
| Smal_1729 | 1.96   | dihydrodipicolinate synthetase                                          |
| Smal_1735 | 2.26   | response regulator receiver protein                                     |
| Smal_1736 | 4.52   | PAS/PAC sensor signal transduction histidine kinase                     |
| Smal_1738 | 2.26   | CheR-type MCP methyltransferase                                         |
| Smal_1740 | 0.38   | response regulator receiver sensor signal transduction histidine kinase |
| Smal_1743 | 2.11   | hypothetical protein                                                    |
| Smal_1747 | 1.81   | AraC family transcriptional regulator                                   |
| Smal_1748 | 2.71   | hypothetical protein                                                    |
| Smal_1749 | 0.34   | bifunctional aspartokinase I/homoserine dehydrogenase I                 |
| Smal_1751 | 0.30   | threonine synthase                                                      |
| Smal_1757 | 1.58   | histidinol dehydrogenase                                                |
| Smal_1760 | 0.23   | imidazole glycerol phosphate synthase subunit HisH                      |
| Smal_1762 | 2.35   | imidazole glycerol phosphate synthase subunit HisF                      |
| Smal_1764 | 2.03   | metallophosphoesterase                                                  |
| Smal_1765 | 0.45   | hypothetical protein                                                    |
| Smal_1766 | 2.49   | glucokinase                                                             |
| Smal_1772 | 2.71   | heavy metal transport/detoxification protein                            |
| Smal_1775 | 1.85   | Lacl family transcriptional regulator                                   |
| Smal_1781 | 1.58   | Acireductone dioxygenase ARD                                            |
| Smal_1783 | 0.30   | hypothetical protein                                                    |
| Smal_1785 | 2.20   | amino acid permease-associated protein                                  |
| Smal_1790 | 2.03   | hypothetical protein                                                    |
| Smal_1792 | 2.11   | winged helix family two component transcriptional regulator             |
| Smal_1795 | -39.95 | hypothetical protein                                                    |
| Smal_1801 | 0.45   | Glyoxalase/bleomycin resistance protein/dioxygenase                     |
| Smal_1802 | 0.39   | enoyl-CoA hydratase/isomerase                                           |

|                  |              |                                                             |
|------------------|--------------|-------------------------------------------------------------|
| Smal_1803        | 1.81         | FeoA family protein                                         |
| Smal_1807        | 8.12         | NAD(P)H dehydrogenase (quinone)                             |
| Smal_1808        | 1.81         | MerR family transcriptional regulator                       |
| Smal_1810        | 4.52         | dihydrodipicolinate reductase                               |
| Smal_1815        | 0.23         | hypothetical protein                                        |
| Smal_1819        | 2.41         | Vault protein inter-alpha-trypsin domain-containing protein |
| Smal_1821        | 2.71         | hypothetical protein                                        |
| Smal_1822        | 26.17        | response regulator receiver protein                         |
| <b>Smal_1830</b> | <b>16.30</b> | <b>enoyl-CoA hydratase (rpfF)</b>                           |
| Smal_1833        | 1.71         | betaine aldehyde dehydrogenase                              |
| Smal_1835        | 0.34         | choline/carnitine/betaine transporter                       |
| Smal_1837        | 42.15        | AbrB family transcriptional regulator                       |
| Smal_1838        | 2.58         | hypothetical protein                                        |
| Smal_1840        | 0.42         | TonB family protein                                         |
| Smal_1841        | 0.45         | TonB family protein                                         |
| Smal_1842        | 17.64        | alpha/beta hydrolase fold domain-containing protein         |
| Smal_1843        | 2.71         | chemotaxis-specific methylesterase                          |
| Smal_1845        | 2.71         | CheR-type MCP methyltransferase                             |
| Smal_1846        | 6.33         | methyl-accepting chemotaxis sensory transducer              |
| Smal_1847        | 1.71         | methyl-accepting chemotaxis sensory transducer              |
| Smal_1849        | 4.52         | CheW protein                                                |
| Smal_1850        | 1.81         | YcgR family protein                                         |
| Smal_1851        | 1.81         | methyl-accepting chemotaxis sensory transducer              |
| Smal_1853        | 1.81         | response regulator receiver protein                         |
| Smal_1855        | 2.71         | CheW protein                                                |
| Smal_1856        | 2.71         | Cobyrinic acid ac-diamide synthase                          |
| Smal_1857        | 4.07         | flagellar motor protein MotD                                |
| Smal_1858        | 9.95         | flagellar motor protein                                     |
| Smal_1859        | 1.81         | CheA signal transduction histidine kinase                   |
| Smal_1861        | 1.81         | response regulator receiver protein                         |
| Smal_1863        | 3.16         | Cobyrinic acid ac-diamide synthase                          |
| Smal_1864        | 1.66         | flagellar biosynthesis regulator FlhF                       |
| Smal_1865        | 2.03         | flagellar biosynthesis protein FlhA                         |
| Smal_1867        | 8.86         | diguanylate cyclase/phosphodiesterase                       |
| Smal_1868        | 17.90        | flagellar biosynthetic protein FliR                         |
| Smal_1869        | 35.10        | export protein FliQ family 3                                |
| Smal_1870        | 1.58         | flagellar biosynthesis protein FliP                         |
| Smal_1872        | 28.18        | flagellar motor switch protein FliN                         |

|           |        |                                                                 |
|-----------|--------|-----------------------------------------------------------------|
| Smal_1873 | 2.41   | flagellar motor switch protein FliM                             |
| Smal_1874 | 4.52   | flagellar basal body-associated protein FliL                    |
| Smal_1875 | 0.45   | flagellar hook-length control protein                           |
| Smal_1876 | 2.26   | flagellar export protein FliJ                                   |
| Smal_1877 | 17.04  | FliI/YscN family ATPase                                         |
| Smal_1878 | 1.81   | flagellar assembly protein FliH                                 |
| Smal_1879 | 2.26   | flagellar motor switch protein FliG                             |
| Smal_1881 | 12.93  | flagellar hook-basal body complex subunit FliE                  |
| Smal_1883 | 1.56   | Fis family sigma-54 specific transcriptional regulator          |
| Smal_1884 | 1.81   | response regulator receiver protein                             |
| Smal_1885 | 10.85  | RNA polymerase sigma-54 subunit RpoN                            |
| Smal_1890 | 1.81   | hypothetical protein                                            |
| Smal_1891 | -50.19 | flagellar protein FliS                                          |
| Smal_1892 | 2.26   | flagellar hook-associated 2 domain-containing protein           |
| Smal_1893 | 2.95   | flagellin                                                       |
| Smal_1894 | 3.13   | flagellin                                                       |
| Smal_1895 | 2.30   | flagellin                                                       |
| Smal_1896 | 3.01   | flagellar hook-associated protein FigL                          |
| Smal_1897 | 3.05   | flagellar hook-associated protein FigK                          |
| Smal_1898 | 2.11   | flagellar rod assembly protein/muramidase FlgJ                  |
| Smal_1903 | 1.87   | flagellar hook protein FlgE                                     |
| Smal_1906 | 1.81   | flagellar basal body rod protein FlgB                           |
| Smal_1907 | 15.00  | response regulator receiver modulated CheW protein              |
| Smal_1908 | 4.52   | flagellar basal body P-ring biosynthesis protein FlgA           |
| Smal_1909 | 2.41   | putative anti-sigma-28 factor FlgM                              |
| Smal_1914 | 6.33   | PAS/PAC sensor-containing diguanylate cyclase/phosphodiesterase |
| Smal_1915 | 35.83  | hypothetical protein                                            |
| Smal_1916 | 15.03  | hypothetical protein                                            |
| Smal_1918 | 1.81   | hypothetical protein                                            |
| Smal_1919 | 1.81   | tRNA-specific 2-thiouridylase MnmA                              |
| Smal_1920 | 1.99   | NUDIX hydrolase                                                 |
| Smal_1922 | 1.51   | ATP-dependent Clp protease adaptor protein ClpS                 |
| Smal_1926 | -38.38 | hypothetical protein                                            |
| Smal_1928 | 2.26   | leucyl/phenylalanyl-tRNA--protein transferase                   |
| Smal_1929 | 3.62   | hypothetical protein                                            |
| Smal_1931 | 1.58   | cell wall hydrolase/autolysin                                   |
| Smal_1932 | 1.58   | thioredoxin reductase                                           |
| Smal_1937 | 4.52   | hypothetical protein                                            |

|           |        |                                                              |
|-----------|--------|--------------------------------------------------------------|
| Smal_1938 | 25.24  | hypothetical protein                                         |
| Smal_1939 | 1.81   | putative esterase                                            |
| Smal_1940 | 1.51   | hypothetical protein                                         |
| Smal_1942 | -5.00  | transport system permease                                    |
| Smal_1946 | 1.81   | hypothetical protein                                         |
| Smal_1951 | 4.40   | type 11 methyltransferase                                    |
| Smal_1952 | -6.65  | hypothetical protein                                         |
| Smal_1954 | 3.75   | cyclopropane-fatty-acyl-phospholipid synthase                |
| Smal_1956 | 0.45   | amine oxidase                                                |
| Smal_1957 | -5.49  | stearoyl-CoA 9-desaturase                                    |
| Smal_1959 | 7.58   | RNA polymerase sigma factor RpoE                             |
| Smal_1961 | -38.21 | hypothetical protein                                         |
| Smal_1965 | -8.59  | NAD(P)H dehydrogenase (quinone)                              |
| Smal_1967 | 0.45   | LysR family transcriptional regulator                        |
| Smal_1968 | 1.81   | Pirin domain-containing protein                              |
| Smal_1971 | 1.71   | putative cointegrate resolution protein T                    |
| Smal_1973 | 0.50   | hypothetical protein                                         |
| Smal_1979 | 1.81   | ArsR family transcriptional regulator                        |
| Smal_1981 | 2.08   | arsenical-resistance protein                                 |
| Smal_1984 | -29.38 | protein tyrosine phosphatase                                 |
| Smal_1994 | -10.14 | OsmC family protein                                          |
| Smal_1995 | 6.15   | NmrA family protein                                          |
| Smal_1996 | 1.81   | LysR family transcriptional regulator                        |
| Smal_1997 | -16.95 | ECF subfamily RNA polymerase sigma-24 subunit                |
| Smal_2000 | 0.45   | ECF subfamily RNA polymerase sigma-24 subunit                |
| Smal_2001 | 0.45   | beta-lactamase domain-containing protein                     |
| Smal_2002 | 0.36   | hypothetical protein                                         |
| Smal_2003 | 0.39   | TetR family transcriptional regulator                        |
| Smal_2005 | 1.68   | TetR family transcriptional regulator                        |
| Smal_2008 | 1.53   | alcohol dehydrogenase zinc-binding domain-containing protein |
| Smal_2011 | 0.45   | major facilitator superfamily protein                        |
| Smal_2012 | 1.81   | aldo/keto reductase                                          |
| Smal_2013 | 1.81   | cupin                                                        |
| Smal_2015 | 0.23   | PepSY-associated TM helix domain-containing protein          |
| Smal_2016 | 0.30   | TonB-dependent siderophore receptor                          |
| Smal_2017 | 1.81   | anti-FecI sigma factor FecR                                  |
| Smal_2019 | 13.88  | hypothetical protein                                         |
| Smal_2020 | 46.05  | hypothetical protein                                         |

|           |        |                                                                         |
|-----------|--------|-------------------------------------------------------------------------|
| SmaI_2023 | 0.45   | acriflavin resistance protein                                           |
| SmaI_2024 | 3.08   | outer membrane efflux protein                                           |
| SmaI_2026 | 7.20   | TetR family transcriptional regulator                                   |
| SmaI_2028 | 1.81   | hypothetical protein                                                    |
| SmaI_2029 | 1.81   | LacI family transcriptional regulator                                   |
| SmaI_2032 | 2.51   | PTS system fructose subfamily transporter subunit IIC                   |
| SmaI_2033 | 1.81   | carbohydrate-selective porin OprB                                       |
| SmaI_2034 | 1.81   | beta-Ig-H3/fasciclin                                                    |
| SmaI_2035 | 0.45   | hypothetical protein                                                    |
| SmaI_2036 | 5.65   | peptidase S1 and S6 chymotrypsin/Hap                                    |
| SmaI_2037 | -56.33 | hypothetical protein                                                    |
| SmaI_2040 | -17.97 | FMN reductase                                                           |
| SmaI_2041 | 0.45   | hypothetical protein                                                    |
| SmaI_2042 | 0.45   | 5- methyltetrahydropteroyltriglutamate/homocysteine S-methyltransferase |
| SmaI_2043 | 0.30   | hypothetical protein                                                    |
| SmaI_2045 | 1.81   | Arsenical pump membrane protein                                         |
| SmaI_2047 | 5.87   | TonB-dependent receptor                                                 |
| SmaI_2049 | 3.48   | multi- copper enzyme maturation ABC transporter permease-like protein   |
| SmaI_2052 | 60.60  | hypothetical protein                                                    |
| SmaI_2053 | 29.32  | hypothetical protein                                                    |
| SmaI_2056 | 9.40   | PHB depolymerase family esterase                                        |
| SmaI_2058 | 10.75  | alpha/beta hydrolase fold domain-containing protein                     |
| SmaI_2059 | 9.73   | MaoC domain-containing protein dehydratase                              |
| SmaI_2063 | -10.63 | hypothetical protein                                                    |
| SmaI_2064 | 1.70   | GntR family transcriptional regulator                                   |
| SmaI_2065 | 0.45   | TonB-dependent receptor                                                 |
| SmaI_2066 | 2.26   | alginate lyase                                                          |
| SmaI_2068 | -8.01  | major facilitator superfamily protein                                   |
| SmaI_2070 | 2.71   | G-D-S-L family lipolytic protein                                        |
| SmaI_2071 | 3.62   | PfkB domain-containing protein                                          |
| SmaI_2074 | 1.81   | peptidase S15                                                           |
| SmaI_2076 | 6.38   | DNA/RNA non-specific endonuclease                                       |
| SmaI_2077 | 3.62   | HAD-superfamily hydrolase                                               |
| SmaI_2078 | 41.05  | hypothetical protein                                                    |
| SmaI_2080 | -2.11  | CheR-type MCP methyltransferase                                         |
| SmaI_2082 | 2.71   | LysR family transcriptional regulator                                   |
| SmaI_2083 | 9.08   | hypothetical protein                                                    |
| SmaI_2085 | 35.23  | hypothetical protein                                                    |

|           |        |                                                               |
|-----------|--------|---------------------------------------------------------------|
| SmaI_2086 | 15.33  | hypothetical protein                                          |
| SmaI_2087 | -3.85  | Fis family sigma-54 specific transcriptional regulator        |
| SmaI_2088 | 8.86   | hypothetical protein                                          |
| SmaI_2089 | 22.95  | hypothetical protein                                          |
| SmaI_2092 | -6.97  | hypothetical protein                                          |
| SmaI_2093 | 10.96  | hypothetical protein                                          |
| SmaI_2095 | 4.41   | NUDIX hydrolase                                               |
| SmaI_2096 | -36.00 | RebB protein                                                  |
| SmaI_2097 | -19.41 | RebB protein                                                  |
| SmaI_2099 | -19.19 | RebB protein                                                  |
| SmaI_2100 | -22.12 | hypothetical protein                                          |
| SmaI_2104 | 40.00  | hypothetical protein                                          |
| SmaI_2105 | 0.45   | putative sigma-54 specific transcriptional regulator          |
| SmaI_2109 | -23.30 | protein tyrosine/serine phosphatase                           |
| SmaI_2110 | -2.27  | TonB-dependent receptor                                       |
| SmaI_2111 | -8.11  | TetR family transcriptional regulator                         |
| SmaI_2112 | -8.94  | hypothetical protein                                          |
| SmaI_2114 | 0.26   | PAS/PAC sensor-containing diguanylate cyclase                 |
| SmaI_2115 | 0.41   | ABC transporter-like protein                                  |
| SmaI_2116 | 0.23   | RND family efflux transporter MFP subunit                     |
| SmaI_2121 | 2.71   | hypothetical protein                                          |
| SmaI_2122 | -12.49 | Siderophore-interacting protein                               |
| SmaI_2123 | 1.51   | TonB-dependent siderophore receptor                           |
| SmaI_2124 | -17.46 | hypothetical protein                                          |
| SmaI_2125 | 0.36   | PepSY-associated TM helix domain-containing protein           |
| SmaI_2126 | -18.78 | hypothetical protein                                          |
| SmaI_2127 | 0.39   | hypothetical protein                                          |
| SmaI_2128 | 1.81   | putative TetR family transcriptional regulator                |
| SmaI_2129 | 0.49   | TonB-dependent siderophore receptor                           |
| SmaI_2132 | 10.85  | conjugal transfer protein TrbP                                |
| SmaI_2134 | -17.46 | hypothetical protein                                          |
| SmaI_2135 | 2.26   | hypothetical protein                                          |
| SmaI_2138 | 1.63   | integral membrane sensor signal transduction histidine kinase |
| SmaI_2139 | 2.41   | two component LuxR family transcriptional regulator           |
| SmaI_2140 | 4.07   | hypothetical protein                                          |
| SmaI_2141 | 4.03   | low temperature requirement A                                 |
| SmaI_2142 | -19.62 | hypothetical protein                                          |
| SmaI_2145 | 0.36   | TonB-dependent receptor                                       |

|           |        |                                                         |
|-----------|--------|---------------------------------------------------------|
| Smal_2146 | 2.26   | beta-lactamase                                          |
| Smal_2147 | 0.45   | hypothetical protein                                    |
| Smal_2150 | 8.81   | hypothetical protein                                    |
| Smal_2152 | 1.99   | TetR family transcriptional regulator                   |
| Smal_2154 | 1.81   | hypothetical protein                                    |
| Smal_2155 | -16.84 | hypothetical protein                                    |
| Smal_2158 | -7.68  | ABC transporter-like protein                            |
| Smal_2161 | 2.16   | TonB-dependent receptor                                 |
| Smal_2166 | 3.45   | heavy metal sensor signal transduction histidine kinase |
| Smal_2169 | 3.07   | CzcA family heavy metal efflux pump                     |
| Smal_2175 | 1.81   | Thioredoxin domain                                      |
| Smal_2176 | 2.20   | hypothetical protein                                    |
| Smal_2177 | -33.04 | hypothetical protein                                    |
| Smal_2181 | 2.26   | hypothetical protein                                    |
| Smal_2183 | 0.30   | response regulator receiver protein                     |
| Smal_2184 | 3.25   | hypothetical protein                                    |
| Smal_2185 | 0.45   | hypothetical protein                                    |
| Smal_2188 | 37.54  | ECF subfamily RNA polymerase sigma-24 subunit           |
| Smal_2193 | -13.42 | OsmC family protein                                     |
| Smal_2194 | -7.49  | ABC transporter-like protein                            |
| Smal_2196 | 5.41   | hypothetical protein                                    |
| Smal_2197 | 6.73   | hypothetical protein                                    |
| Smal_2198 | 11.43  | biopolymer transport protein ExbD/TolR                  |
| Smal_2203 | 10.58  | general secretion pathway protein H                     |
| Smal_2205 | -17.00 | type II secretion system protein J                      |
| Smal_2207 | 3.62   | alkaline phosphatase                                    |
| Smal_2208 | 0.30   | alkaline phosphatase                                    |
| Smal_2209 | 0.45   | general secretion pathway protein F                     |
| Smal_2210 | 0.45   | general secretory pathway protein E                     |
| Smal_2211 | -8.77  | general secretion pathway protein D                     |
| Smal_2213 | 0.45   | general secretion pathway protein L                     |
| Smal_2214 | 10.43  | General secretion pathway protein K                     |
| Smal_2215 | 54.01  | general secretion pathway protein G                     |
| Smal_2216 | 3.62   | hypothetical protein                                    |
| Smal_2217 | -9.47  | hypothetical protein                                    |
| Smal_2218 | 0.45   | Fe <sup>2+</sup> -dicitrate sensor, membrane protein    |
| Smal_2220 | 6.94   | Secretin/TonB short domain                              |
| Smal_2221 | 1.81   | AsnC family transcriptional regulator                   |



|           |        |                                                          |
|-----------|--------|----------------------------------------------------------|
| SmaI_2226 | 0.23   | ABC transporter-like protein                             |
| SmaI_2227 | 2.03   | molybdate ABC transporter inner membrane subunit         |
| SmaI_2229 | 1.51   | Crp/Fnr family transcriptional regulator                 |
| SmaI_2234 | 1.79   | nitrate reductase molybdenum cofactor assembly chaperone |
| SmaI_2241 | 1.65   | sulfur transfer protein ThiS                             |
| SmaI_2245 | 1.81   | ribonucleotide reductase subunit alpha                   |
| SmaI_2247 | -27.92 | hypothetical protein                                     |
| SmaI_2251 | 0.34   | YD repeat-containing protein                             |
| SmaI_2252 | -6.57  | AraC family transcriptional regulator                    |
| SmaI_2253 | 0.15   | fusaric acid resistance protein                          |
| SmaI_2255 | 5.34   | secretion protein HlyD family protein                    |
| SmaI_2257 | 1.68   | hypothetical protein                                     |
| SmaI_2258 | 1.81   | hypothetical protein                                     |
| SmaI_2259 | 0.30   | hypothetical protein                                     |
| SmaI_2260 | 7.23   | hypothetical protein                                     |
| SmaI_2261 | 0.30   | hypothetical protein                                     |
| SmaI_2262 | 1.81   | diacylglycerol kinase                                    |
| SmaI_2263 | 1.81   | hypothetical protein                                     |
| SmaI_2264 | 4.52   | hypothetical protein                                     |
| SmaI_2266 | 0.45   | hypothetical protein                                     |
| SmaI_2267 | -13.85 | hypothetical protein                                     |
| SmaI_2269 | -4.50  | TonB-dependent receptor                                  |
| SmaI_2270 | 19.40  | hypothetical protein                                     |
| SmaI_2271 | 0.45   | short-chain dehydrogenase/reductase SDR                  |
| SmaI_2272 | 2.71   | enterobactin synthase subunit F                          |
| SmaI_2273 | 18.37  | phosphopantetheine-binding protein                       |
| SmaI_2275 | -9.48  | AMP-dependent synthetase and ligase                      |
| SmaI_2278 | 1.81   | inner membrane protein                                   |
| SmaI_2280 | 2.71   | N-acetyltransferase GCN5                                 |
| SmaI_2281 | 0.18   | Thioredoxin domain                                       |
| SmaI_2289 | -12.09 | TonB-dependent receptor plug                             |
| SmaI_2290 | 0.30   | alkyl hydroperoxide reductase                            |
| SmaI_2293 | 5.43   | Thioredoxin domain                                       |
| SmaI_2299 | 1.64   | choline/carnitine/betaine transporter                    |
| SmaI_2301 | -19.92 | ECF subfamily RNA polymerase sigma-24 subunit            |
| SmaI_2302 | -11.06 | anti-FecI sigma factor FecR                              |
| SmaI_2303 | 0.30   | TonB-dependent receptor                                  |
| SmaI_2304 | 43.84  | small multidrug resistance protein                       |

|           |        |                                                      |
|-----------|--------|------------------------------------------------------|
| SmaI_2305 | 5.43   | small multidrug resistance protein                   |
| SmaI_2308 | 1.81   | TonB-dependent siderophore receptor                  |
| SmaI_2312 | 1.58   | type 11 methyltransferase                            |
| SmaI_2313 | -86.43 | hypothetical protein                                 |
| SmaI_2315 | -2.03  | YadA domain-containing protein                       |
| SmaI_2317 | -54.66 | Flp/Fap pilin component                              |
| SmaI_2318 | -9.58  | peptidase A24A prepilin type IV                      |
| SmaI_2320 | 4.55   | Flp pilus assembly protein CpaB                      |
| SmaI_2321 | 0.45   | type II and III secretion system protein             |
| SmaI_2324 | -5.46  | type II secretion system protein                     |
| SmaI_2325 | 5.05   | type II secretion system protein                     |
| SmaI_2327 | -23.73 | hypothetical protein                                 |
| SmaI_2330 | 24.65  | hypothetical protein                                 |
| SmaI_2331 | 5.73   | alpha/beta hydrolase fold domain-containing protein  |
| SmaI_2332 | 2.86   | hypothetical protein                                 |
| SmaI_2333 | 3.68   | hypothetical protein                                 |
| SmaI_2334 | -5.30  | amidohydrolase                                       |
| SmaI_2335 | -12.28 | DoxX family protein                                  |
| SmaI_2340 | -23.98 | two component LuxR family transcriptional regulator  |
| SmaI_2341 | -7.93  | BAAT/Acyl-CoA thioester hydrolase                    |
| SmaI_2343 | 0.45   | histidine kinase internal region                     |
| SmaI_2344 | 3.62   | amidohydrolase                                       |
| SmaI_2345 | 6.73   | ankyrin                                              |
| SmaI_2346 | 3.62   | LysR family transcriptional regulator                |
| SmaI_2347 | -35.84 | hypothetical protein                                 |
| SmaI_2348 | 0.30   | cytosine deaminase                                   |
| SmaI_2351 | 64.96  | hypothetical protein                                 |
| SmaI_2352 | 3.62   | hypothetical protein                                 |
| SmaI_2353 | -5.74  | TonB-dependent receptor                              |
| SmaI_2355 | 2.71   | CDP-diacylglycerol pyrophosphatase                   |
| SmaI_2358 | 0.49   | hypothetical protein                                 |
| SmaI_2361 | 1.58   | GntR family transcriptional regulator                |
| SmaI_2362 | 2.11   | L-lactate transport                                  |
| SmaI_2365 | 14.86  | AraC family transcriptional regulator                |
| SmaI_2366 | 2.53   | hypothetical protein                                 |
| SmaI_2367 | 5.43   | X-Pro dipeptidyl-peptidase domain-containing protein |
| SmaI_2368 | -13.52 | hypothetical protein                                 |
| SmaI_2369 | 0.45   | major facilitator superfamily protein                |

|           |        |                                                                          |
|-----------|--------|--------------------------------------------------------------------------|
| SmaI_2370 | -17.48 | LysR family transcriptional regulator                                    |
| SmaI_2371 | 1.51   | beta-glucosidase                                                         |
| SmaI_2373 | -14.83 | AraC family transcriptional regulator                                    |
| SmaI_2376 | 7.26   | DSBA oxidoreductase                                                      |
| SmaI_2377 | -31.10 | cyclase family protein                                                   |
| SmaI_2378 | 5.43   | cell division inhibitor Sula                                             |
| SmaI_2379 | 13.40  | DNA repair nucleotidyltransferase/DNA polymerase-like protein            |
| SmaI_2380 | 0.15   | error-prone DNA polymerase                                               |
| SmaI_2381 | 2.71   | hypothetical protein                                                     |
| SmaI_2387 | 9.27   | ECF subfamily RNA polymerase sigma-24 subunit                            |
| SmaI_2388 | -5.64  | anti-FecI sigma factor FecR                                              |
| SmaI_2389 | 0.23   | TonB-dependent receptor                                                  |
| SmaI_2390 | -19.58 | hypothetical protein                                                     |
| SmaI_2391 | 0.47   | TonB family protein                                                      |
| SmaI_2397 | 0.39   | redoxin domain-containing protein                                        |
| SmaI_2398 | 4.42   | cyclic nucleotide-binding protein                                        |
| SmaI_2401 | 0.30   | hypothetical protein                                                     |
| SmaI_2403 | 0.23   | N-acetyltransferase GCN5                                                 |
| SmaI_2405 | 0.30   | Pas/Pac sensor-containing methyl-accepting chemotaxis sensory transducer |
| SmaI_2412 | 20.89  | hypothetical protein                                                     |
| SmaI_2413 | 1.81   | phage shock protein C, PspC                                              |
| SmaI_2421 | 2.17   | hypothetical protein                                                     |
| SmaI_2423 | 1.63   | mechanosensitive ion channel MscS                                        |
| SmaI_2424 | -28.09 | NADH:flavin oxidoreductase                                               |
| SmaI_2426 | 1.81   | oligoribonuclease                                                        |
| SmaI_2427 | 4.07   | zinc-binding CMP/dCMP deaminase                                          |
| SmaI_2429 | 0.45   | NAD(P)H dehydrogenase (quinone)                                          |
| SmaI_2432 | 1.51   | N-acetyltransferase GCN5                                                 |
| SmaI_2433 | 3.62   | hypothetical protein                                                     |
| SmaI_2449 | 0.45   | hypothetical protein                                                     |
| SmaI_2452 | 3.62   | hypothetical protein                                                     |
| SmaI_2456 | 0.18   | hypothetical protein                                                     |
| SmaI_2457 | 0.30   | hypothetical protein                                                     |
| SmaI_2458 | 2.71   | hypothetical protein                                                     |
| SmaI_2461 | 0.18   | TonB-dependent siderophore receptor                                      |
| SmaI_2463 | -7.75  | winged helix family two component transcriptional regulator              |
| SmaI_2464 | 3.62   | integral membrane sensor signal transduction histidine kinase            |
| SmaI_2466 | 1.81   | RND family efflux transporter MFP subunit                                |

|           |        |                                                                         |
|-----------|--------|-------------------------------------------------------------------------|
| SmaI_2467 | -8.02  | ABC transporter-like protein                                            |
| SmaI_2470 | -26.50 | hypothetical protein                                                    |
| SmaI_2476 | 0.23   | hypothetical protein                                                    |
| SmaI_2477 | 1.81   | hypothetical protein                                                    |
| SmaI_2479 | 0.49   | hypothetical protein                                                    |
| SmaI_2483 | 0.45   | hypothetical protein                                                    |
| SmaI_2484 | 1.81   | hypothetical protein                                                    |
| SmaI_2485 | 1.60   | hypothetical protein                                                    |
| SmaI_2486 | -15.63 | hypothetical protein                                                    |
| SmaI_2488 | 8.42   | carbohydrate-binding GenC domain-containing protein                     |
| SmaI_2493 | 12.62  | hypothetical protein                                                    |
| SmaI_2496 | -20.76 | phage protein, HK97 gp10 family                                         |
| SmaI_2499 | 10.04  | hypothetical protein                                                    |
| SmaI_2501 | 16.82  | peptidase S14 ClpP                                                      |
| SmaI_2502 | -12.41 | phage portal protein, HK97 family                                       |
| SmaI_2503 | 1.81   | terminase                                                               |
| SmaI_2505 | 14.61  | HNH endonuclease                                                        |
| SmaI_2507 | 1.81   | hypothetical protein                                                    |
| SmaI_2508 | 1.81   | hypothetical protein                                                    |
| SmaI_2513 | -77.14 | hypothetical protein                                                    |
| SmaI_2514 | -14.19 | hypothetical protein                                                    |
| SmaI_2515 | 6.62   | hypothetical protein                                                    |
| SmaI_2517 | 30.36  | hypothetical protein                                                    |
| SmaI_2518 | 2.71   | hypothetical protein                                                    |
| SmaI_2519 | 0.45   | CI repressor                                                            |
| SmaI_2520 | 2.17   | hypothetical protein                                                    |
| SmaI_2521 | -27.33 | hypothetical protein                                                    |
| SmaI_2525 | -13.63 | hypothetical protein                                                    |
| SmaI_2526 | -20.80 | hypothetical protein                                                    |
| SmaI_2530 | 21.96  | phage transcriptional regulator AlpA                                    |
| SmaI_2531 | 1.51   | hypothetical protein                                                    |
| SmaI_2533 | 2.26   | NAD(P)H dehydrogenase (quinone)                                         |
| SmaI_2534 | 0.30   | Variant SH3 domain-containing protein                                   |
| SmaI_2537 | 1.81   | TonB family protein                                                     |
| SmaI_2538 | 1.88   | 3-phosphoshikimate 1-carboxyvinyltransferase                            |
| SmaI_2542 | 0.34   | polyhydroxyalkanoic acid system protein                                 |
| SmaI_2547 | 2.03   | transcriptional regulator, histidine utilization repressor, GntR family |
| SmaI_2553 | 0.26   | beta-lactamase                                                          |

|           |        |                                                              |
|-----------|--------|--------------------------------------------------------------|
| SmaI_2555 | 0.14   | TonB-dependent receptor                                      |
| SmaI_2556 | 17.91  | hypothetical protein                                         |
| SmaI_2557 | -13.40 | hypothetical protein                                         |
| SmaI_2558 | 2.11   | hypothetical protein                                         |
| SmaI_2559 | -9.08  | TetR family transcriptional regulator                        |
| SmaI_2560 | 8.66   | hypothetical protein                                         |
| SmaI_2561 | 4.17   | Agmatine deiminase                                           |
| SmaI_2563 | 2.26   | G-D-S-L family lipolytic protein                             |
| SmaI_2564 | 0.18   | hypothetical protein                                         |
| SmaI_2566 | 1.81   | hypothetical protein                                         |
| SmaI_2568 | -47.60 | hypothetical protein                                         |
| SmaI_2573 | 0.45   | beta-lactamase                                               |
| SmaI_2575 | -23.07 | LysR family transcriptional regulator                        |
| SmaI_2576 | 2.03   | alcohol dehydrogenase zinc-binding domain-containing protein |
| SmaI_2577 | 1.51   | membrane-bound PQQ-dependent dehydrogenase                   |
| SmaI_2580 | 1.81   | hypothetical protein                                         |
| SmaI_2593 | 1.81   | hypothetical protein                                         |
| SmaI_2594 | 4.97   | hypothetical protein                                         |
| SmaI_2595 | 2.58   | FMN-binding negative transcriptional regulator               |
| SmaI_2597 | 0.30   | 3-hydroxyanthranilate 3,4-dioxygenase                        |
| SmaI_2599 | 1.96   | kynurenine 3-monooxygenase                                   |
| SmaI_2601 | 2.26   | hypothetical protein                                         |
| SmaI_2602 | 2.49   | hypothetical protein                                         |
| SmaI_2604 | 0.45   | inorganic polyphosphate/ATP-NAD kinase                       |
| SmaI_2619 | 0.40   | hypothetical protein                                         |
| SmaI_2621 | 1.51   | ABC transporter-like protein                                 |
| SmaI_2623 | 1.61   | hypothetical protein                                         |
| SmaI_2624 | 2.15   | hypothetical protein                                         |
| SmaI_2625 | 0.45   | hypothetical protein                                         |
| SmaI_2634 | 22.27  | hypothetical protein                                         |
| SmaI_2636 | 0.23   | TonB-dependent receptor                                      |
| SmaI_2640 | 14.50  | transketolase domain-containing protein                      |
| SmaI_2644 | 0.15   | hypothetical protein                                         |
| SmaI_2647 | 10.88  | hypothetical protein                                         |
| SmaI_2649 | 2.21   | cold-shock DNA-binding domain-containing protein             |
| SmaI_2652 | 2.11   | arsenate reductase                                           |
| SmaI_2656 | 0.18   | ECF subfamily RNA polymerase sigma-24 subunit                |
| SmaI_2658 | 0.41   | ABC transporter-like protein                                 |

|           |        |                                                                  |
|-----------|--------|------------------------------------------------------------------|
| SmaI_2660 | 0.15   | glutathione peroxidase                                           |
| SmaI_2665 | 2.71   | hypothetical protein                                             |
| SmaI_2677 | 1.58   | RluA family pseudouridine synthase                               |
| SmaI_2679 | 42.29  | endonuclease/exonuclease/phosphatase                             |
| SmaI_2680 | 1.75   | coagulation factor 5/8 type domain-containing protein            |
| SmaI_2681 | 0.45   | monosaccharide-transporting ATPase                               |
| SmaI_2683 | 0.30   | family 1 extracellular solute-binding protein                    |
| SmaI_2684 | 3.44   | hypothetical protein                                             |
| SmaI_2685 | 1.92   | TonB-dependent receptor                                          |
| SmaI_2686 | 1.81   | LacI family transcriptional regulator                            |
| SmaI_2687 | 1.81   | BolA family protein                                              |
| SmaI_2688 | 3.62   | hypothetical protein                                             |
| SmaI_2690 | 0.50   | segregation and condensation protein B                           |
| SmaI_2694 | 0.18   | hypothetical protein                                             |
| SmaI_2695 | -53.45 | hypothetical protein                                             |
| SmaI_2696 | 0.26   | hypothetical protein                                             |
| SmaI_2697 | 1.81   | nitrilase/cyanide hydratase and apolipoprotein N-acyltransferase |
| SmaI_2698 | 2.17   | putative aminotransferase                                        |
| SmaI_2701 | 1.81   | heme exporter protein CcmC                                       |
| SmaI_2702 | 1.81   | heme exporter protein CcmD                                       |
| SmaI_2706 | 2.11   | cytochrome C biogenesis protein                                  |
| SmaI_2707 | 2.41   | hypothetical protein                                             |
| SmaI_2709 | -18.00 | hypothetical protein                                             |
| SmaI_2714 | 1.81   | cyd operon protein YbgT                                          |
| SmaI_2716 | 0.45   | HmsH protein                                                     |
| SmaI_2717 | -5.54  | polysaccharide deacetylase                                       |
| SmaI_2718 | 3.76   | N-glycosyltransferase                                            |
| SmaI_2719 | 0.45   | hypothetical protein                                             |
| SmaI_2721 | 0.23   | gamma-glutamyl kinase                                            |
| SmaI_2723 | 0.41   | argininosuccinate lyase                                          |
| SmaI_2725 | 0.50   | amino-acid acetyltransferase                                     |
| SmaI_2733 | 0.30   | major facilitator superfamily protein                            |
| SmaI_2750 | 3.16   | acetoacetyl-CoA reductase                                        |
| SmaI_2753 | 1.63   | hypothetical protein                                             |
| SmaI_2758 | 1.58   | iron-sulfur cluster binding protein                              |
| SmaI_2759 | 1.81   | exodeoxyribonuclease VII large subunit                           |
| SmaI_2760 | 2.71   | peptidase M48 Ste24p                                             |
| SmaI_2763 | -25.25 | hypothetical protein                                             |

|           |        |                                                                   |
|-----------|--------|-------------------------------------------------------------------|
| SmaI_2765 | -8.85  | TetR family transcriptional regulator                             |
| SmaI_2766 | 0.45   | Xylose isomerase domain-containing protein                        |
| SmaI_2769 | 54.57  | hypothetical protein                                              |
| SmaI_2771 | 6.20   | short chain dehydrogenase                                         |
| SmaI_2772 | 10.03  | AraC family transcriptional regulator                             |
| SmaI_2773 | -5.09  | alcohol dehydrogenase zinc-binding domain-containing protein      |
| SmaI_2775 | 1.81   | lipocalin family protein                                          |
| SmaI_2780 | 0.45   | hypothetical protein                                              |
| SmaI_2783 | 46.74  | hypothetical protein                                              |
| SmaI_2784 | 4.52   | hypothetical protein                                              |
| SmaI_2787 | 2.11   | small multidrug resistance protein                                |
| SmaI_2789 | 0.34   | lysine exporter protein LysE/YggA                                 |
| SmaI_2790 | 0.45   | ATP-dependent Clp protease proteolytic subunit                    |
| SmaI_2792 | 2.11   | ArsR family transcriptional regulator                             |
| SmaI_2793 | 2.71   | aspartate racemase                                                |
| SmaI_2794 | 59.75  | hypothetical protein                                              |
| SmaI_2795 | -10.26 | hypothetical protein                                              |
| SmaI_2796 | -59.15 | hypothetical protein                                              |
| SmaI_2797 | 0.36   | N-acetyltransferase GCN5                                          |
| SmaI_2798 | 1.58   | MerR family transcriptional regulator                             |
| SmaI_2807 | 1.81   | hypothetical protein                                              |
| SmaI_2810 | -5.05  | hypothetical protein                                              |
| SmaI_2823 | 0.50   | NADH dehydrogenase subunit I                                      |
| SmaI_2827 | 1.63   | NADH dehydrogenase subunit E                                      |
| SmaI_2844 | -5.89  | LysR family transcriptional regulator                             |
| SmaI_2846 | -7.38  | signal recognition particle-docking protein FtsY                  |
| SmaI_2849 | 2.26   | hypothetical protein                                              |
| SmaI_2852 | 52.16  | Glyoxalase/bleomycin resistance protein/dioxygenase               |
| SmaI_2853 | 1.56   | hypothetical protein                                              |
| SmaI_2858 | 0.50   | electron transport protein SCO1/SenC                              |
| SmaI_2864 | -12.49 | putative putative transmembrane protein                           |
| SmaI_2868 | 3.62   | hypothetical protein                                              |
| SmaI_2878 | 1.81   | amine oxidase                                                     |
| SmaI_2880 | 15.63  | methylated-DNA--protein-cysteine methyltransferase                |
| SmaI_2881 | 0.45   | hypothetical protein                                              |
| SmaI_2883 | 2.11   | pyridine nucleotide-disulfide oxidoreductase dimerisation protein |
| SmaI_2885 | 0.15   | hypothetical protein                                              |
| SmaI_2888 | 1.81   | NLP/P60 protein                                                   |

|           |        |                                                             |
|-----------|--------|-------------------------------------------------------------|
| SmaI_2891 | 17.42  | hypothetical protein                                        |
| SmaI_2892 | 1.51   | tRNA(Ile)-lysidine synthetase                               |
| SmaI_2893 | 1.51   | exodeoxyribonuclease VII small subunit                      |
| SmaI_2894 | 1.81   | polyprenyl synthetase                                       |
| SmaI_2903 | 1.63   | TonB family protein                                         |
| SmaI_2904 | 1.52   | TonB-dependent receptor                                     |
| SmaI_2905 | 2.41   | arginine/ornithine antiporter                               |
| SmaI_2906 | 2.03   | xylanase                                                    |
| SmaI_2909 | 0.15   | nicotinic acid mononucleotide adenylyltransferase           |
| SmaI_2913 | -17.52 | hypothetical protein                                        |
| SmaI_2917 | 3.32   | hypothetical protein                                        |
| SmaI_2919 | 5.43   | hypothetical protein                                        |
| SmaI_2920 | 20.73  | hypothetical protein                                        |
| SmaI_2921 | 0.30   | hypothetical protein                                        |
| SmaI_2924 | 0.18   | Glyoxalase/bleomycin resistance protein/dioxygenase         |
| SmaI_2925 | 2.03   | hypothetical protein                                        |
| SmaI_2927 | 2.07   | HAD-superfamily hydrolase                                   |
| SmaI_2928 | 1.81   | ferredoxin                                                  |
| SmaI_2929 | 2.11   | endoribonuclease L-PSP                                      |
| SmaI_2931 | 0.40   | virulence factor family protein                             |
| SmaI_2933 | 50.22  | hypothetical protein                                        |
| SmaI_2934 | 2.71   | hypothetical protein                                        |
| SmaI_2935 | 2.71   | hypothetical protein                                        |
| SmaI_2936 | 1.63   | alkylphosphonate utilization operon protein PhnA            |
| SmaI_2937 | 1.58   | heat shock protein                                          |
| SmaI_2944 | 0.36   | hypothetical protein                                        |
| SmaI_2947 | 1.94   | hypothetical protein                                        |
| SmaI_2949 | 3.16   | hypothetical protein                                        |
| SmaI_2950 | 0.39   | RNA-binding S4 domain-containing protein                    |
| SmaI_2956 | 1.85   | outer membrane protein                                      |
| SmaI_2961 | -10.61 | DEAD/DEAH box helicase                                      |
| SmaI_2962 | 0.45   | metallophosphoesterase                                      |
| SmaI_2964 | 0.36   | monooxygenase FAD-binding                                   |
| SmaI_2966 | 2.98   | 5'-methylthioadenosine phosphorylase                        |
| SmaI_2971 | 1.68   | 23S rRNA 5-methyluridine methyltransferase                  |
| SmaI_2974 | 1.57   | GTP-binding protein Era                                     |
| SmaI_2990 | -40.26 | Glyoxalase/bleomycin resistance protein/dioxygenase         |
| SmaI_2992 | 5.43   | winged helix family two component transcriptional regulator |



|           |        |                                                                 |
|-----------|--------|-----------------------------------------------------------------|
| SmaI_2994 | -13.61 | hypothetical protein                                            |
| SmaI_2996 | 1.85   | peptidyl-dipeptidase A                                          |
| SmaI_2997 | 0.30   | hypothetical protein                                            |
| SmaI_2998 | -23.30 | FAD-binding 9 siderophore-interacting domain-containing protein |
| SmaI_2999 | 1.99   | Bcr/CfIA subfamily drug resistance transporter                  |
| SmaI_3003 | 2.11   | AraC family transcriptional regulator                           |
| SmaI_3006 | 2.11   | hypothetical protein                                            |
| SmaI_3007 | 1.58   | methyl-accepting chemotaxis sensory transducer                  |
| SmaI_3009 | 1.92   | hypothetical protein                                            |
| SmaI_3010 | 0.18   | ErfK/YbiS/YcfS/YnhG family protein                              |
| SmaI_3012 | -7.81  | hypothetical protein                                            |
| SmaI_3014 | 0.30   | hypothetical protein                                            |
| SmaI_3017 | 7.23   | YhdH/YhfP family quinone oxidoreductase                         |
| SmaI_3022 | 1.58   | penicillin-binding protein 1C                                   |
| SmaI_3027 | 2.03   | putative addiction module antidote protein                      |
| SmaI_3032 | 2.26   | DoxX family protein                                             |
| SmaI_3038 | 3.62   | hypothetical protein                                            |
| SmaI_3042 | 0.47   | integral membrane sensor hybrid histidine kinase                |
| SmaI_3043 | 1.81   | hypothetical protein                                            |
| SmaI_3044 | 0.30   | cytochrome B561                                                 |
| SmaI_3046 | 62.38  | glutaredoxin                                                    |
| SmaI_3047 | 1.73   | L-serine dehydratase 1                                          |
| SmaI_3048 | 8.14   | alpha/beta hydrolase fold domain-containing protein             |
| SmaI_3049 | 0.18   | Homoserine dehydrogenase                                        |
| SmaI_3050 | 0.36   | cystathionine gamma-synthase                                    |
| SmaI_3051 | 0.30   | homoserine O-acetyltransferase                                  |
| SmaI_3052 | -5.85  | peptidase M23                                                   |
| SmaI_3054 | 3.32   | hemolysin III family channel protein                            |
| SmaI_3055 | 0.45   | AsmA family protein                                             |
| SmaI_3056 | 0.30   | putative signal transduction protein                            |
| SmaI_3059 | 1.74   | Hsp33 protein                                                   |
| SmaI_3066 | -44.74 | hypothetical protein                                            |
| SmaI_3067 | 3.62   | hypothetical protein                                            |
| SmaI_3069 | 18.68  | short-chain dehydrogenase/reductase SDR                         |
| SmaI_3070 | 0.45   | LysR family transcriptional regulator                           |
| SmaI_3074 | 4.52   | hypothetical protein                                            |
| SmaI_3076 | 4.52   | hypothetical protein                                            |
| SmaI_3077 | 0.45   | hypothetical protein                                            |

|           |        |                                                               |
|-----------|--------|---------------------------------------------------------------|
| SmaI_3083 | 1.51   | CheW protein                                                  |
| SmaI_3084 | 1.81   | hypothetical protein                                          |
| SmaI_3085 | 1.50   | CheA signal transduction histidine kinase                     |
| SmaI_3087 | 1.55   | CheW protein                                                  |
| SmaI_3089 | 2.35   | response regulator receiver protein                           |
| SmaI_3090 | 2.03   | glutathione synthetase                                        |
| SmaI_3095 | 1.51   | penicillin-binding protein 1B                                 |
| SmaI_3096 | 1.55   | family 2 glycosyl transferase                                 |
| SmaI_3097 | 0.45   | NAD-dependent epimerase/dehydratase                           |
| SmaI_3098 | 2.71   | hypothetical protein                                          |
| SmaI_3107 | 46.10  | N-acetyltransferase GCN5                                      |
| SmaI_3109 | 4.52   | abortive infection protein                                    |
| SmaI_3110 | 22.21  | response regulator receiver protein                           |
| SmaI_3112 | -18.60 | putative esterase                                             |
| SmaI_3113 | 1.58   | hypothetical protein                                          |
| SmaI_3114 | 1.81   | hypothetical protein                                          |
| SmaI_3124 | 2.51   | Holliday junction DNA helicase RuvB                           |
| SmaI_3125 | 0.39   | K potassium transporter                                       |
| SmaI_3133 | 19.06  | hypothetical protein                                          |
| SmaI_3134 | 4.97   | hypothetical protein                                          |
| SmaI_3135 | 4.52   | sodium/hydrogen exchanger                                     |
| SmaI_3136 | 2.71   | beta-lactamase                                                |
| SmaI_3137 | 1.81   | LysR family transcriptional regulator                         |
| SmaI_3141 | 3.62   | O-acetylhomoserine/O-acetylserine sulfhydrylase               |
| SmaI_3142 | 0.18   | winged helix family two component transcriptional regulator   |
| SmaI_3143 | 1.81   | integral membrane sensor signal transduction histidine kinase |
| SmaI_3144 | 2.35   | MltA-interacting MipA family protein                          |
| SmaI_3149 | 4.07   | thiamine pyrophosphate domain-containing TPP-binding protein  |
| SmaI_3150 | 1.68   | hypothetical protein                                          |
| SmaI_3151 | 1.51   | hypothetical protein                                          |
| SmaI_3153 | 2.07   | HAD-superfamily hydrolase                                     |
| SmaI_3155 | 2.05   | alpha,alpha-trehalose-phosphate synthase                      |
| SmaI_3156 | 1.81   | putative thiol-disulfide oxidoreductase DCC                   |
| SmaI_3157 | 2.11   | hypothetical protein                                          |
| SmaI_3159 | 4.07   | RluA family pseudouridine synthase                            |
| SmaI_3161 | 3.16   | hypothetical protein                                          |
| SmaI_3169 | 1.51   | group 1 glycosyl transferase                                  |
| SmaI_3176 | 1.51   | fimbrial protein pilin                                        |

|           |        |                                                               |
|-----------|--------|---------------------------------------------------------------|
| Smal_3180 | 1.51   | integral membrane sensor signal transduction histidine kinase |
| Smal_3184 | 0.18   | alpha-L-glutamase ligase                                      |
| Smal_3187 | 0.49   | hypothetical protein                                          |
| Smal_3189 | 70.81  | sulfur carrier protein ThiS                                   |
| Smal_3192 | 1.58   | TrkA-C domain-containing protein                              |
| Smal_3194 | 0.45   | hypothetical protein                                          |
| Smal_3197 | 1.81   | peptidase M28                                                 |
| Smal_3198 | 0.45   | amino acid carrier protein                                    |
| Smal_3201 | 1.81   | amino acid carrier protein                                    |
| Smal_3203 | 2.41   | acriflavin resistance protein                                 |
| Smal_3204 | -4.72  | RND family efflux transporter MFP subunit                     |
| Smal_3206 | 0.30   | hypothetical protein                                          |
| Smal_3209 | 0.25   | transcriptional regulator CysB-like protein                   |
| Smal_3215 | 2.86   | HAD-superfamily hydrolase                                     |
| Smal_3221 | 2.11   | S1/P1 nuclease                                                |
| Smal_3224 | 1.58   | TonB family protein                                           |
| Smal_3226 | 2.71   | flavin reductase domain-containing protein                    |
| Smal_3232 | 2.49   | von Willebrand factor type A                                  |
| Smal_3233 | 1.81   | hypothetical protein                                          |
| Smal_3234 | 0.30   | hypothetical protein                                          |
| Smal_3236 | 2.00   | type IV pilus secretin PilQ                                   |
| Smal_3241 | 1.81   | penicillin-binding protein                                    |
| Smal_3242 | 3.62   | hypothetical protein                                          |
| Smal_3244 | -27.88 | hypothetical protein                                          |
| Smal_3246 | 0.45   | putative fimbrial protein                                     |
| Smal_3248 | 0.45   | outermembrane fimbrial usher protein                          |
| Smal_3249 | -10.44 | CS1 type fimbrial major subunit                               |
| Smal_3252 | -20.26 | AraC family transcriptional regulator                         |
| Smal_3257 | 1.51   | endoribonuclease L-PSP                                        |
| Smal_3265 | 1.72   | L-seryl-tRNA(Sec) selenium transferase                        |
| Smal_3272 | 2.61   | putative deoxyribonucleotide triphosphate pyrophosphatase     |
| Smal_3274 | 1.74   | hypothetical protein                                          |
| Smal_3276 | 1.81   | proline dipeptidase                                           |
| Smal_3279 | 0.18   | hypothetical protein                                          |
| Smal_3284 | 1.63   | hypothetical protein                                          |
| Smal_3290 | 23.52  | HAD-superfamily hydrolase                                     |
| Smal_3291 | 1.55   | acetylornithine transaminase protein                          |
| Smal_3292 | 4.52   | lon transport protein                                         |

|           |        |                                                               |
|-----------|--------|---------------------------------------------------------------|
| SmaI_3295 | 2.26   | short chain dehydrogenase                                     |
| SmaI_3298 | 3.16   | serine/threonine protein kinase                               |
| SmaI_3299 | 1.81   | PA-phosphatase-like phosphoesterase                           |
| SmaI_3305 | 5.43   | hypothetical protein                                          |
| SmaI_3306 | 1.67   | hypothetical protein                                          |
| SmaI_3309 | -24.57 | TonB system transport protein ExbD                            |
| SmaI_3310 | 1.81   | tonB-system energizer ExbB                                    |
| SmaI_3311 | -11.18 | hypothetical protein                                          |
| SmaI_3312 | -8.89  | heme oxygenase-like protein                                   |
| SmaI_3313 | 36.73  | hypothetical protein                                          |
| SmaI_3314 | 0.23   | TonB-dependent receptor                                       |
| SmaI_3315 | 1.81   | anti-FecI sigma factor FecR                                   |
| SmaI_3316 | 0.30   | ECF subfamily RNA polymerase sigma-24 subunit                 |
| SmaI_3318 | 1.91   | inorganic pyrophosphatase                                     |
| SmaI_3322 | 0.40   | AraC family transcriptional regulator                         |
| SmaI_3327 | 5.33   | gamma-glutamyltransferase                                     |
| SmaI_3328 | 1.58   | ketol-acid reductoisomerase                                   |
| SmaI_3331 | 1.81   | threonine dehydratase                                         |
| SmaI_3332 | 2.17   | 2-isopropylmalate synthase                                    |
| SmaI_3333 | 12.21  | type 11 methyltransferase                                     |
| SmaI_3335 | 1.81   | 3-isopropylmalate dehydratase small subunit                   |
| SmaI_3336 | 1.81   | 3-isopropylmalate dehydrogenase                               |
| SmaI_3337 | 12.21  | short-chain dehydrogenase/reductase SDR                       |
| SmaI_3341 | 1.52   | TetR family transcriptional regulator                         |
| SmaI_3342 | 1.53   | protein-L-isoaspartate(D-aspartate) O-methyltransferase       |
| SmaI_3344 | 0.15   | hypothetical protein                                          |
| SmaI_3348 | 0.45   | group 1 glycosyl transferase                                  |
| SmaI_3349 | 119.81 | hypothetical protein                                          |
| SmaI_3350 | 2.29   | alpha-1,2-mannosidase                                         |
| SmaI_3351 | 2.07   | hypothetical protein                                          |
| SmaI_3355 | 2.07   | PAS/PAC sensor hybrid histidine kinase                        |
| SmaI_3356 | 0.23   | two component LuxR family transcriptional regulator           |
| SmaI_3357 | 1.81   | family 1 extracellular solute-binding protein                 |
| SmaI_3358 | 0.23   | integral membrane sensor signal transduction histidine kinase |
| SmaI_3359 | 0.30   | winged helix family two component transcriptional regulator   |
| SmaI_3363 | -6.82  | TonB-dependent receptor                                       |
| SmaI_3375 | 2.71   | DSBA oxidoreductase                                           |
| SmaI_3378 | 0.30   | NodT family RND efflux system outer membrane lipoprotein      |

|           |        |                                                                   |
|-----------|--------|-------------------------------------------------------------------|
| Smal_3380 | 0.45   | major facilitator superfamily protein                             |
| Smal_3381 | 0.41   | LysR family transcriptional regulator                             |
| Smal_3383 | 1.81   | hypothetical protein                                              |
| Smal_3384 | 6.53   | diguanylate cyclase                                               |
| Smal_3389 | 22.53  | hypothetical protein                                              |
| Smal_3391 | 1.51   | NADH:flavin oxidoreductase                                        |
| Smal_3393 | 5.43   | hypothetical protein                                              |
| Smal_3399 | 1.81   | hypothetical protein                                              |
| Smal_3400 | 1.81   | AraC family transcriptional regulator                             |
| Smal_3403 | 1.66   | cytochrome c class I                                              |
| Smal_3407 | -5.97  | hypothetical protein                                              |
| Smal_3408 | 9.79   | AsnC family transcriptional regulator                             |
| Smal_3411 | 0.43   | TonB-dependent receptor                                           |
| Smal_3415 | 2.33   | multifunctional tRNA nucleotidyl transferase                      |
| Smal_3417 | 0.30   | hypothetical protein                                              |
| Smal_3418 | -35.34 | peptidase S41                                                     |
| Smal_3422 | 1.66   | glutamine--fructose-6-phosphate transaminase                      |
| Smal_3425 | 3.01   | glucokinase                                                       |
| Smal_3426 | 1.81   | TonB-dependent receptor                                           |
| Smal_3427 | 2.71   | beta-N-acetylhexosaminidase                                       |
| Smal_3432 | 2.26   | 20S proteasome subunits A and B                                   |
| Smal_3433 | 1.53   | response regulator receiver sensor hybrid histidine kinase        |
| Smal_3438 | 1.85   | 6-phosphogluconate dehydrogenase                                  |
| Smal_3440 | 4.97   | hypothetical protein                                              |
| Smal_3445 | 0.48   | hypothetical protein                                              |
| Smal_3447 | 1.56   | rare lipoprotein A                                                |
| Smal_3449 | -19.35 | rod shape-determining protein RodA                                |
| Smal_3451 | 3.32   | penicillin-binding protein 2                                      |
| Smal_3458 | 3.26   | hypothetical protein                                              |
| Smal_3462 | 0.45   | hypothetical protein                                              |
| Smal_3466 | 1.55   | NodT family RND efflux system outer membrane lipoprotein          |
| Smal_3468 | 1.59   | RND family efflux transporter MFP subunit                         |
| Smal_3475 | 1.68   | hypothetical protein                                              |
| Smal_3476 | 1.95   | diaminopimelate epimerase                                         |
| Smal_3477 | 0.30   | hypothetical protein                                              |
| Smal_3482 | 0.18   | hypothetical protein                                              |
| Smal_3484 | 1.81   | binding-protein-dependent transport system inner membrane protein |
| Smal_3487 | 2.17   | putative nucleotide-binding protein                               |

|           |        |                                                                     |
|-----------|--------|---------------------------------------------------------------------|
| Smal_3490 | 1.56   | aldehyde dehydrogenase                                              |
| Smal_3491 | 2.71   | hypothetical protein                                                |
| Smal_3492 | 2.49   | short-chain dehydrogenase/reductase SDR                             |
| Smal_3494 | 2.71   | hypothetical protein                                                |
| Smal_3496 | 1.77   | lactoylglutathione lyase                                            |
| Smal_3501 | 0.45   | ABC transporter-like protein                                        |
| Smal_3502 | 0.30   | hypothetical protein                                                |
| Smal_3504 | 12.23  | hypothetical protein                                                |
| Smal_3505 | 1.81   | two component sigma54 specific Fis family transcriptional regulator |
| Smal_3506 | 1.51   | integral membrane sensor signal transduction histidine kinase       |
| Smal_3509 | 5.43   | GtrA family protein                                                 |
| Smal_3515 | 1.67   | F0F1 ATP synthase subunit B                                         |
| Smal_3522 | 0.30   | hypothetical protein                                                |
| Smal_3524 | 0.30   | glycerol-3-phosphate dehydrogenase                                  |
| Smal_3525 | -17.41 | glycerol kinase                                                     |
| Smal_3528 | 0.13   | hypothetical protein                                                |
| Smal_3532 | 2.26   | histidine kinase internal region                                    |
| Smal_3538 | 0.34   | NAD-dependent epimerase/dehydratase                                 |
| Smal_3541 | 1.81   | hypothetical protein                                                |
| Smal_3542 | 0.30   | peptidase M24                                                       |
| Smal_3545 | -3.55  | EmrB/QacA subfamily drug resistance transporter                     |
| Smal_3546 | 0.23   | TetR family transcriptional regulator                               |
| Smal_3547 | 1.81   | Glyoxalase/bleomycin resistance protein/dioxygenase                 |
| Smal_3548 | -52.20 | hypothetical protein                                                |
| Smal_3549 | 1.81   | outer membrane autotransporter barrel domain-containing protein     |
| Smal_3551 | 0.18   | LysR family transcriptional regulator                               |
| Smal_3552 | 0.30   | major facilitator superfamily protein                               |
| Smal_3554 | 2.26   | peptidoglycan glycosyltransferase                                   |
| Smal_3555 | 0.45   | hypothetical protein                                                |
| Smal_3556 | 0.36   | TonB-dependent receptor                                             |
| Smal_3557 | -10.22 | hypothetical protein                                                |
| Smal_3559 | 3.01   | AraC family transcriptional regulator                               |
| Smal_3560 | 2.11   | glutathione S-transferase domain-containing protein                 |
| Smal_3561 | 0.45   | hypothetical protein                                                |
| Smal_3563 | 0.45   | DoxX family protein                                                 |
| Smal_3564 | 3.32   | hypothetical protein                                                |
| Smal_3569 | 0.18   | ATPase AAA                                                          |
| Smal_3570 | 1.63   | hypothetical protein                                                |

|           |        |                                                               |
|-----------|--------|---------------------------------------------------------------|
| SmaI_3571 | 1.60   | hypothetical protein                                          |
| SmaI_3573 | 1.99   | D-tyrosyl-tRNA(Tyr) deacylase                                 |
| SmaI_3575 | 1.59   | GTP cyclohydrolase                                            |
| SmaI_3576 | 2.11   | membrane-flanked domain-containing protein                    |
| SmaI_3578 | 0.50   | CDP-glycerol:poly(glycerophosphate) glycerophosphotransferase |
| SmaI_3579 | 0.23   | family 2 glycosyl transferase                                 |
| SmaI_3582 | 0.42   | glycosyl transferase family protein                           |
| SmaI_3586 | 2.26   | peptidoglycan-binding LysM                                    |
| SmaI_3589 | 1.97   | fimbrial protein pilin                                        |
| SmaI_3592 | 2.41   | SUA5/yciO/yrdC domain                                         |
| SmaI_3593 | 4.52   | hypothetical protein                                          |
| SmaI_3596 | -24.62 | hypothetical protein                                          |
| SmaI_3600 | 18.81  | hypothetical protein                                          |
| SmaI_3605 | -57.74 | hypothetical protein                                          |
| SmaI_3606 | 10.95  | hypothetical protein                                          |
| SmaI_3609 | 1.51   | hypothetical protein                                          |
| SmaI_3610 | 4.52   | RND family efflux transporter MFP subunit                     |
| SmaI_3615 | 2.49   | hypothetical protein                                          |
| SmaI_3618 | 1.66   | MarR family transcriptional regulator                         |
| SmaI_3619 | 0.36   | integral membrane sensor signal transduction histidine kinase |
| SmaI_3620 | -14.77 | winged helix family two component transcriptional regulator   |
| SmaI_3621 | 1.81   | hypothetical protein                                          |
| SmaI_3623 | 22.30  | glutathione S-transferase domain-containing protein           |
| SmaI_3624 | 0.15   | LysR family transcriptional regulator                         |
| SmaI_3625 | 7.69   | hypothetical protein                                          |
| SmaI_3628 | 6.33   | endonuclease I                                                |
| SmaI_3629 | 1.51   | CutA1 divalent ion tolerance protein                          |
| SmaI_3630 | 0.41   | C-type cytochrome biogenesis protein                          |
| SmaI_3631 | 1.51   | alkyl hydroperoxide reductase                                 |
| SmaI_3632 | 0.45   | flavodoxin/nitric oxide synthase                              |
| SmaI_3634 | -24.89 | N-hydroxyarylamine O-acetyltransferase                        |
| SmaI_3635 | -14.07 | Glyoxalase/bleomycin resistance protein/dioxygenase           |
| SmaI_3636 | 3.62   | family 3 extracellular solute-binding protein                 |
| SmaI_3637 | 1.81   | LysR family transcriptional regulator                         |
| SmaI_3639 | 2.11   | hypothetical protein                                          |
| SmaI_3641 | 7.23   | TetR family transcriptional regulator                         |
| SmaI_3644 | -12.58 | hypothetical protein                                          |
| SmaI_3647 | 2.41   | hypothetical protein                                          |

|           |        |                                                                  |
|-----------|--------|------------------------------------------------------------------|
| SmaI_3648 | 1.56   | acetyl-CoA carboxylase biotin carboxyl carrier protein subunit   |
| SmaI_3651 | 2.16   | hypothetical protein                                             |
| SmaI_3653 | 2.26   | hypothetical protein                                             |
| SmaI_3654 | 0.45   | DNA-binding protein Fis                                          |
| SmaI_3655 | 0.45   | phosphatidate cytidyltransferase                                 |
| SmaI_3656 | 1.81   | phospholipid/glycerol acyltransferase                            |
| SmaI_3657 | 64.81  | hypothetical protein                                             |
| SmaI_3658 | 2.17   | putative dual specificity phosphatase                            |
| SmaI_3659 | 0.45   | hypothetical protein                                             |
| SmaI_3661 | -8.38  | hypothetical protein                                             |
| SmaI_3663 | 2.94   | hypothetical protein                                             |
| SmaI_3667 | 0.45   | CopY family transcriptional repressor                            |
| SmaI_3675 | 2.33   | thioredoxin                                                      |
| SmaI_3676 | 1.55   | transcription termination factor Rho                             |
| SmaI_3679 | 0.18   | bifunctional isocitrate dehydrogenase kinase/phosphatase protein |
| SmaI_3680 | 39.45  | hypothetical protein                                             |
| SmaI_3682 | -9.53  | hypothetical protein                                             |
| SmaI_3683 | 0.36   | hypothetical protein                                             |
| SmaI_3685 | 1.68   | hypothetical protein                                             |
| SmaI_3687 | 2.20   | 7-cyano-7-deazaguanine reductase                                 |
| SmaI_3688 | 1.68   | amidohydrolase                                                   |
| SmaI_3691 | 0.49   | acriflavin resistance protein                                    |
| SmaI_3692 | 0.26   | TonB-dependent siderophore receptor                              |
| SmaI_3693 | 0.50   | YccS/YhfK family integral membrane protein                       |
| SmaI_3694 | -13.15 | short-chain dehydrogenase/reductase SDR                          |
| SmaI_3707 | 1.51   | bacterioferritin                                                 |
| SmaI_3708 | 0.23   | BFD (2Fe-2S)-binding domain-containing protein                   |
| SmaI_3712 | 4.07   | ubiquinone biosynthesis protein                                  |
| SmaI_3713 | 0.30   | small multidrug resistance protein                               |
| SmaI_3715 | 1.51   | cAMP-regulatory protein                                          |
| SmaI_3716 | 0.18   | hypothetical protein                                             |
| SmaI_3717 | 2.26   | haloacid dehalogenase domain-containing protein hydrolase        |
| SmaI_3723 | 2.20   | lipid kinase                                                     |
| SmaI_3726 | 1.81   | heat shock protein DnaJ domain-containing protein                |
| SmaI_3727 | 2.26   | phosphoribosylaminoimidazole-succinocarboxamide synthase         |
| SmaI_3730 | 2.45   | putative monovalent cation/H <sup>+</sup> antiporter subunit C   |
| SmaI_3732 | 0.45   | putative monovalent cation/H <sup>+</sup> antiporter subunit E   |
| SmaI_3734 | 1.51   | putative monovalent cation/H <sup>+</sup> antiporter subunit G   |



|           |        |                                                             |
|-----------|--------|-------------------------------------------------------------|
| SmaI_3735 | 0.30   | sodium/calcium exchanger membrane protein                   |
| SmaI_3741 | 0.45   | hypothetical protein                                        |
| SmaI_3743 | 3.01   | putative thioredoxin                                        |
| SmaI_3749 | 1.53   | branched-chain alpha-keto acid dehydrogenase subunit E2     |
| SmaI_3750 | 0.30   | hypothetical protein                                        |
| SmaI_3752 | -7.38  | helix-turn-helix type 11 domain-containing protein          |
| SmaI_3754 | 0.36   | diguanylate cyclase                                         |
| SmaI_3756 | 1.51   | ABC-1 domain-containing protein                             |
| SmaI_3757 | 1.81   | phosphoglycerol transferase I                               |
| SmaI_3759 | 0.15   | hypothetical protein                                        |
| SmaI_3761 | 0.18   | FAD dependent oxidoreductase                                |
| SmaI_3763 | 0.30   | hypothetical protein                                        |
| SmaI_3767 | 0.45   | hypothetical protein                                        |
| SmaI_3769 | 1.54   | spermidine synthase                                         |
| SmaI_3771 | 0.30   | Mn <sup>2+</sup> -dependent serine/threonine protein kinase |
| SmaI_3774 | 3.16   | rifampin ADP-ribosyl transferase                            |
| SmaI_3777 | 0.15   | hypothetical protein                                        |
| SmaI_3779 | 66.30  | hypothetical protein                                        |
| SmaI_3782 | 0.30   | Mg chelatase subunit ChII                                   |
| SmaI_3785 | 2.26   | sugar phosphatase                                           |
| SmaI_3787 | 1.58   | L-sorbose dehydrogenase                                     |
| SmaI_3788 | 2.71   | hypothetical protein                                        |
| SmaI_3789 | 2.03   | peptidase S8/S53 subtilisin kexin sedolisin                 |
| SmaI_3791 | -6.57  | electron transport protein SCO1/SenC                        |
| SmaI_3793 | -16.44 | cytochrome o ubiquinol oxidase subunit III                  |
| SmaI_3797 | -20.08 | hypothetical protein                                        |
| SmaI_3798 | 7.88   | hypothetical protein                                        |
| SmaI_3799 | 4.52   | GntR family transcriptional regulator                       |
| SmaI_3800 | 0.23   | class V aminotransferase                                    |
| SmaI_3801 | 0.45   | TonB-dependent receptor                                     |
| SmaI_3802 | 1.51   | hypothetical protein                                        |
| SmaI_3804 | 0.45   | hypothetical protein                                        |
| SmaI_3806 | 1.81   | hypothetical protein                                        |
| SmaI_3811 | 34.79  | hypothetical protein                                        |
| SmaI_3814 | 0.34   | glycoside hydrolase family protein                          |
| SmaI_3816 | 2.71   | ROK family protein                                          |
| SmaI_3817 | -7.83  | D-tagatose-bisphosphate aldolase non-catalytic subunit      |
| SmaI_3818 | 1.81   | DNA-binding transcriptional regulator AgaR                  |

|           |        |                                                                   |
|-----------|--------|-------------------------------------------------------------------|
| SmaI_3820 | 0.30   | general substrate transporter                                     |
| SmaI_3821 | 1.81   | hypothetical protein                                              |
| SmaI_3823 | -7.51  | competence protein F                                              |
| SmaI_3824 | 0.30   | hypothetical protein                                              |
| SmaI_3827 | 3.62   | biotin synthase                                                   |
| SmaI_3828 | 4.52   | 8-amino-7-oxononanoate synthase                                   |
| SmaI_3829 | 1.51   | bioH protein                                                      |
| SmaI_3835 | 1.58   | tRNA uridine 5-carboxymethylaminomethyl modification protein GidA |
| SmaI_3838 | 19.73  | RND family efflux transporter MFP subunit                         |
| SmaI_3839 | -11.26 | integral membrane sensor signal transduction histidine kinase     |
| SmaI_3840 | 0.23   | winged helix family two component transcriptional regulator       |
| SmaI_3841 | 1.51   | hypothetical protein                                              |
| SmaI_3843 | 2.11   | RDD domain-containing protein                                     |
| SmaI_3847 | 0.30   | ATPase                                                            |
| SmaI_3848 | 2.26   | hypothetical protein                                              |
| SmaI_3850 | 1.61   | hypothetical protein                                              |
| SmaI_3851 | 2.41   | dihydroxy-acid dehydratase                                        |
| SmaI_3855 | 2.71   | hypothetical protein                                              |
| SmaI_3856 | 1.89   | shikimate 5-dehydrogenase                                         |
| SmaI_3857 | 2.56   | WD40 domain-containing protein                                    |
| SmaI_3860 | 1.94   | hypothetical protein                                              |
| SmaI_3861 | 2.26   | hypothetical protein                                              |
| SmaI_3862 | 0.30   | hypothetical protein                                              |
| SmaI_3864 | 1.81   | hypothetical protein                                              |
| SmaI_3866 | 2.26   | glutathione S-transferase domain-containing protein               |
| SmaI_3867 | 1.81   | hypothetical protein                                              |
| SmaI_3868 | 2.94   | TonB family protein                                               |
| SmaI_3869 | 37.17  | hypothetical protein                                              |
| SmaI_3870 | -13.10 | AraC family transcriptional regulator                             |
| SmaI_3871 | -7.35  | hypothetical protein                                              |
| SmaI_3877 | 0.18   | chitin-binding protein                                            |
| SmaI_3878 | 2.71   | chitin-binding protein                                            |
| SmaI_3882 | 0.39   | hypothetical protein                                              |
| SmaI_3884 | 2.71   | NAD-dependent epimerase/dehydratase                               |
| SmaI_3885 | 1.81   | TatD-related deoxyribonuclease                                    |
| SmaI_3886 | 3.16   | ATP-dependent helicase HrpB                                       |
| SmaI_3888 | 2.26   | pseudouridine synthase                                            |
| SmaI_3890 | 1.58   | putative methyltransferase                                        |

|           |        |                                                            |
|-----------|--------|------------------------------------------------------------|
| SmaI_3894 | 4.07   | FAD-dependent pyridine nucleotide-disulfide oxidoreductase |
| SmaI_3897 | 1.51   | LysR family transcriptional regulator                      |
| SmaI_3900 | 13.35  | alpha/beta hydrolase fold domain-containing protein        |
| SmaI_3901 | -13.74 | hypothetical protein                                       |
| SmaI_3907 | 1.88   | hypothetical protein                                       |
| SmaI_3912 | -18.74 | hypothetical protein                                       |
| SmaI_3916 | 1.58   | thioesterase superfamily protein                           |
| SmaI_3917 | 0.50   | Histidine ammonia-lyase                                    |
| SmaI_3918 | 10.85  | lipid A biosynthesis acyltransferase                       |
| SmaI_3922 | 1.51   | acyl carrier protein                                       |
| SmaI_3925 | 0.45   | hypothetical protein                                       |
| SmaI_3926 | 3.62   | cytochrome d ubiquinol oxidase subunit II                  |
| SmaI_3927 | 2.26   | cytochrome bd ubiquinol oxidase subunit I                  |
| SmaI_3928 | 0.39   | hypothetical protein                                       |
| SmaI_3929 | 0.45   | hypothetical protein                                       |
| SmaI_3931 | 3.62   | ECF subfamily RNA polymerase sigma-24 subunit              |
| SmaI_3932 | 28.70  | hypothetical protein                                       |
| SmaI_3935 | -27.96 | hypothetical protein                                       |
| SmaI_3936 | 4.21   | hypothetical protein                                       |
| SmaI_3937 | 3.16   | hypothetical protein                                       |
| SmaI_3940 | 3.62   | hypothetical protein                                       |
| SmaI_3949 | 1.58   | phospholipase D/transphosphatidylase                       |
| SmaI_3952 | 5.43   | DNA polymerase III subunit epsilon                         |
| SmaI_3956 | 1.66   | outer membrane efflux protein                              |
| SmaI_3957 | 1.71   | RND family efflux transporter MFP subunit                  |
| SmaI_3960 | -11.06 | integrase catalytic subunit                                |
| SmaI_3964 | 1.54   | hypothetical protein                                       |
| SmaI_3965 | 2.28   | parB-like partition protein                                |
| SmaI_3967 | 1.81   | 16S rRNA methyltransferase GidB                            |
| SmaI_3968 | 3.62   | 4'-phosphopantetheinyl transferase                         |
| SmaI_3969 | 2.89   | transglycosylase-associated protein                        |
| SmaI_3970 | 2.26   | exodeoxyribonuclease III                                   |
| SmaI_3971 | 2.03   | aldehyde dehydrogenase                                     |
| SmaI_3973 | 1.99   | hypothetical protein                                       |
| SmaI_3974 | 1.93   | acetyl-CoA synthetase                                      |
| SmaI_3975 | 1.69   | two component LuxR family transcriptional regulator        |
| SmaI_3977 | 0.30   | hypothetical protein                                       |
| SmaI_3978 | 1.55   | multi-sensor hybrid histidine kinase                       |

|            |        |                                                                          |
|------------|--------|--------------------------------------------------------------------------|
| SmaI_3981  | 1.51   | surface antigen (D15)                                                    |
| SmaI_3982  | 1.58   | glycyl-tRNA synthetase subunit beta                                      |
| SmaI_3985  | 1.51   | glutamine amidotransferase                                               |
| SmaI_3986  | 2.35   | hypothetical protein                                                     |
| SmaI_3987  | 0.27   | Sec-independent protein translocase subunit TatC                         |
| SmaI_3992  | 3.92   | alpha/beta hydrolase fold domain-containing protein                      |
| SmaI_3993  | 0.45   | Pas/Pac sensor-containing methyl-accepting chemotaxis sensory transducer |
| SmaI_3995  | 0.35   | hypothetical protein                                                     |
| SmaI_3999  | 0.30   | hypothetical protein                                                     |
| SmaI_4003  | 1.51   | hypothetical protein                                                     |
| SmaI_4004  | 1.91   | hypothetical protein                                                     |
| SmaI_4007  | 1.70   | MarR family transcriptional regulator                                    |
| SmaI_4008  | 0.36   | hypothetical protein                                                     |
| SmaI_4011  | 0.41   | fusaric acid resistance protein                                          |
| SmaI_4012  | 0.45   | hypothetical protein                                                     |
| SmaI_4013  | 1.51   | exodeoxyribonuclease V subunit alpha                                     |
| SmaI_4014  | 2.08   | exodeoxyribonuclease V subunit beta                                      |
| SmaI_4020  | 2.44   | hypothetical protein                                                     |
| SmaI_4023  | -52.46 | hypothetical protein                                                     |
| SmaI_4025  | -25.88 | glutathione S-transferase domain-containing protein                      |
| SmaI_4029  | 0.30   | hypothetical protein                                                     |
| SmaI_4030  | 2.71   | hypothetical protein                                                     |
| SmaI_4037  | 2.17   | rhomboid family protein                                                  |
| SmaI_4038  | 1.63   | glycerophosphoryl diester phosphodiesterase                              |
| SmaI_4040  | 0.36   | putative phage-like protein                                              |
| SmaI_4041  | 2.26   | tRNA modification GTPase TrmE                                            |
| SmaI_R0001 | -69.60 | tRNA-Thr                                                                 |
| SmaI_R0011 | 41.41  | 5S ribosomal RNA                                                         |
| SmaI_R0020 | 2.26   | tRNA-Arg1                                                                |
| SmaI_R0023 | 0.49   | tRNA-Lys2                                                                |
| SmaI_R0024 | -62.14 | tRNA-Leu1                                                                |
| SmaI_R0030 | 104.90 | tRNA-Ser1                                                                |
| SmaI_R0031 | 41.41  | SRP RNA; RNA component of signal recognition particle                    |
| SmaI_R0033 | 63.79  | tRNA-Val2                                                                |
| SmaI_R0035 | -60.70 | tRNA-Leu7                                                                |
| SmaI_R0036 | -60.70 | tRNA-Leu6                                                                |
| SmaI_R0037 | 168.58 | tRNA-Leu5                                                                |
| SmaI_R0042 | -69.60 | tRNA-Gly3                                                                |

|            |        |                  |
|------------|--------|------------------|
| SmaI_R0044 | -69.60 | tRNA-Gly5        |
| SmaI_R0045 | -71.51 | tRNA-Cys1        |
| SmaI_R0046 | 0.18   | tRNA-Leu4        |
| SmaI_R0047 | 3.62   | tRNA-Ser2        |
| SmaI_R0051 | -70.54 | tRNA-Glu4        |
| SmaI_R0054 | 2.56   | tRNA-Ala3        |
| SmaI_R0061 | -58.65 | tRNA-Ser3        |
| SmaI_R0063 | 62.11  | tRNA-Pro3        |
| SmaI_R0064 | 62.94  | tRNA-Ala6        |
| SmaI_R0073 | 1.51   | tRNA-Gly6        |
| SmaI_R0074 | 4.52   | tRNA-SeC1        |
| SmaI_R0078 | 2.41   | tRNA-Gln2        |
| SmaI_R0080 | 0.38   | tRNA-Arg4        |
| SmaI_R0081 | 82.81  | 5S ribosomal RNA |
